# Supplementary material for: Adverse drug events in a paediatric intensive care unit: a prospective cohort
Source: PubMed Central journal article supplement — BMJ Open. 2013 Feb 15;3(2):e001868. doi: 10.1136/bmjopen-2012-001868 (PMC3586175; doi:10.1136/bmjopen-2012-001868), 2013-02-15
Supplement: bmjopen-2012-001868.draft_revisions.pdf [file bmjopen-2012-001868.draft_revisions.pdf]

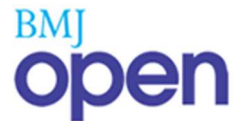

**ADVERSE DRUG EVENTS IN A PEDIATRIC INTENSIVE CARE  
UNIT: A PROSPECTIVE COHORT**

|                                 |                                                                                                                                                                                                                                                                                                                                                                                                                                                                                                                                                               |
|---------------------------------|---------------------------------------------------------------------------------------------------------------------------------------------------------------------------------------------------------------------------------------------------------------------------------------------------------------------------------------------------------------------------------------------------------------------------------------------------------------------------------------------------------------------------------------------------------------|
| Journal:                        | <i>BMJ Open</i>                                                                                                                                                                                                                                                                                                                                                                                                                                                                                                                                               |
| Manuscript ID:                  | bmjopen-2012-001868                                                                                                                                                                                                                                                                                                                                                                                                                                                                                                                                           |
| Article Type:                   | Research                                                                                                                                                                                                                                                                                                                                                                                                                                                                                                                                                      |
| Date Submitted by the Author:   | 24-Jul-2012                                                                                                                                                                                                                                                                                                                                                                                                                                                                                                                                                   |
| Complete List of Authors:       | Silva, Dafne; Faculty of Medicine, University of Sao Paulo, FMUSP, Instituto da Criança<br>Araujo, Orlei; Instituto de Oncologia Pediatrica, Intensive Care Unit<br>Arduini, Rodrigo; Instituto de Oncologia Pediatrica (GRAAC/IOP/UNIFESP), Intensive Care Unit<br>Alonso, Carolina; Instituto de Oncologia Pediatrica (GRAAC/IOP/UNIFESP), Intensive Care Unit<br>Shibata, Audrey; Faculty of Medicine, University of Sao Paulo, FMUSP, Instituto da Criança<br>Troster, Eduardo; Faculty of Medicine, University of Sao Paulo, FMUSP, Instituto da Criança |
| <b>Primary Subject Heading</b>: | Intensive care                                                                                                                                                                                                                                                                                                                                                                                                                                                                                                                                                |
| Secondary Subject Heading:      | Paediatrics, Pharmacology and therapeutics                                                                                                                                                                                                                                                                                                                                                                                                                                                                                                                    |
| Keywords:                       | Paediatric intensive & critical care < ANAESTHETICS, Adverse events < THERAPEUTICS, Toxicity < THERAPEUTICS                                                                                                                                                                                                                                                                                                                                                                                                                                                   |
|                                 |                                                                                                                                                                                                                                                                                                                                                                                                                                                                                                                                                               |

SCHOLARONE™  
Manuscripts

only

**TITLE PAGE****ADVERSE DRUG EVENTS IN A PEDIATRIC INTENSIVE CARE UNIT: A PROSPECTIVE COHORT**

Correspondent author: Orlei Ribeiro de Araujo.  
Address: Rua Botucatu 743 CEP 04023062 São Paulo- SP- Brazil  
Phone: +55115080 8400 – e-mail: [orlei@uol.com.br](mailto:orlei@uol.com.br)

**Authors:**

**Dafne C. B. Silva** – MD, Master in Pediatrics, Instituto da Criança, Faculty of Medicine, University of Sao Paulo, FMUSP, Brazil. [dafnechs@gmail.com](mailto:dafnechs@gmail.com)

**Orlei R. Araujo** - MD, Master in Pediatrics, Pediatric Oncology Institute (GRAACC/IOP), Federal University of Sao Paulo, Brazil. [orlei@uol.com.br](mailto:orlei@uol.com.br)

**Rodrigo G. Arduini** - MD, Pediatric Oncology Institute (GRAACC/IOP), Federal University of Sao Paulo, Brazil. [rodrigogenaro@gmail.com](mailto:rodrigogenaro@gmail.com)

**Carolina F. R. Alonso** - MD, Pediatric Oncology Institute (GRAACC/IOP), Federal University of Sao Paulo, Brazil. [carolinaalonso13@gmail.com](mailto:carolinaalonso13@gmail.com)

**Audrey R. O. Shibata** – MD, Instituto da Criança, Faculty of Medicine, University of Sao Paulo, FMUSP, Brazil. [audrey.shibata.110@gmail.com](mailto:audrey.shibata.110@gmail.com).

**Eduardo J. Troster.** PhD, Instituto da Criança, Faculty of Medicine, University of Sao Paulo, FMUSP, Brazil. [troster@einstein.br](mailto:troster@einstein.br)

**Institution:**

Instituto da Criança - Faculty of Medicine, University of Sao Paulo, FMUSP, Brazil.  
Adress: Av. Dr. Eneas Carvalho de Aguiar, 647, São Paulo - SP - Brasil CEP - 05403.000 –  
Phone: +5511 2661- 8500  
Home page: <http://icr.usp.br/>

Key Words: drug toxicity; pharmacovigilance; drug monitoring; intensive care; pediatrics; patient safety.

## ABSTRACT

**Objective:** To identify the rates and risk factors of adverse drug events (ADEs) in children under intensive care.

**Design:** Prospective, observational study.

**Setting:** Pediatric intensive care unit of a tertiary care teaching hospital.

**Patients:** 239 patients with a mean age of 67.5 months representing 1818 days of hospitalization in intensive care unit .

**Interventions:** Active search of charts and electronic patient records using indicative parameters ("triggers"). The statistical analysis involved linear and logistic regression.

**Measurements and Main Results:** The average PICU stay was 7.6 days. There were 110 proven, probable, and possible ADEs in 84 patients (35.1%). We observed 138 instances of triggers. The major classes of drugs associated with events were: antibiotics (n = 41), diuretics (n = 24), antiseizures (n = 23), sedatives and analgesics (n = 17), and steroids (n = 18). The number of drugs administered was most related to the occurrence of ADEs and also to the length of stay ( $p < 0.001$ ). The occurrence of an ADE may result in an increase in the length of stay by 1.5 days per event. Patient aged less than 48 months also proved to be at significant risk for ADEs, with an odds ratio of 1.84 (confidence interval - 95% CI - 1.07 to 3.15,  $p = 0.025$ ). The number of drugs administered also correlated with the number of ADEs ( $p < 0.0001$ ). The chance of having at least one ADE increased linearly as the patient was administered more drugs.

1  
2  
3 **Conclusions:** The use of multiple drugs as well as lower patient age favor the occurrence  
4 of ADEs, which in turn may result in increasing the length of PICU hospitalization. The  
5 active search provides a systematic approach to the problem.  
6  
7  
8  
9

## 10 11 12 **INTRODUCTION**

13  
14 The use of medication in children and infants is a matter of great concern largely due to the  
15 vulnerability of their constantly changing and developing homeostasis, as well as the  
16 unique mechanisms by which different children respond to injuries. There are important  
17 differences in absorption, distribution, metabolism and excretion of drugs during childhood  
18 and early adolescence.<sup>1</sup> In addition, several medications have not exhibited safety in the  
19 pediatric age group, while others are prescribed differently than recommended for adults;  
20 key differences include dose and frequency of administration, presentation of the drug,  
21 route of administration, or indication for use in childhood (i.e. "off-label" use), and each of  
22 these factors can vary depending on the age of the child.<sup>2</sup> In the majority of instances,  
23 recommended doses of drugs used in children are based on extrapolations from adult doses,  
24 related only to weight, body surface area, and age, often ignoring their pharmacokinetic and  
25 pharmacodynamic properties; this results in increased susceptibility of children to drug-  
26 related adverse events.<sup>1-4</sup>  
27  
28  
29  
30  
31  
32  
33  
34  
35  
36  
37  
38  
39  
40  
41  
42  
43  
44

45  
46 Reports documenting the incidence of adverse drug events in the pediatric  
47 population range from 4.3% to 16.7%; 12.2% of these events being serious in nature, with  
48 high morbidity and mortality.<sup>5</sup> Hospitalized children may be at a higher risk of an adverse  
49 event, as doses, drug safety, and effectiveness are often difficult to determine.<sup>6</sup> Kaushal  
50 and colleagues identified that the potential frequency of ADEs in children is three times  
51 higher than a previous study focused on ADEs in adults, however, the rate of avoidable  
52  
53  
54  
55  
56  
57  
58  
59  
60

1  
2  
3 ADEs was similar.<sup>4</sup> In intensive care units, multiple, potentially hazardous drugs are  
4  
5 routinely administered, such as inotropes, sedation medications, analgesia, and antibiotics;  
6  
7 as the risk of an ADE increases by 1.7% for each additional drug used,<sup>5</sup> it is far more likely  
8  
9 that adverse reactions will occur in the ICU.  
10  
11

12  
13 There are few studies documenting safety in drug administration in children in the  
14  
15 ICU. The primary objective of this study was to describe ADEs in children admitted to the  
16  
17 pediatric ICU (PICU) of a tertiary care hospital in Sao Paulo, Brazil. As a second objective,  
18  
19 we attempted to identify risk factors for such events and tools that could detect them early.  
20  
21

## 22 23 24 **MATERIALS AND METHODS**

25  
26 We conducted a preliminary survey over a period of 22 days in March 2004 to  
27  
28 identify the number of admissions required to effectively report ADEs in the PICU, a unit  
29  
30 of 13 beds, with average occupation of 80%. Based on the results of this survey, we  
31  
32 determined that it would then be necessary to study 150 admissions to reach a stable  
33  
34 estimate of the incidence of ADEs and explore possible risk factors using a multivariate  
35  
36 analysis (approximately 10 ADEs for each variable potentially associated). The study  
37  
38 population consisted of consecutive admissions to the PICU between October 1, 2005 and  
39  
40 March 31, 2006. The strategy to identify ADEs was through an active search, using pre-  
41  
42 established parameters ("triggers"). A "trigger" can be defined as an occurrence, prompt, or  
43  
44 flag, found when reviewing a patient's medical chart, that requires further investigation to  
45  
46 determine the presence or absence of an adverse event.<sup>7,8</sup> The following methodology was  
47  
48 undertaken:  
49  
50  
51  
52

53  
54  
55 1. The admission form for each new patient in the PICU was entered by two trained  
56  
57 intensive care pediatricians;  
58  
59  
60

1  
2  
3 2. The following records for each patient were reviewed, guided by triggers indicative of  
4  
5 adverse events:  
6

7  
8 - Laboratory tests (electronic database);  
9

10 - Clinical annotations;  
11

12 - Nursing annotations;  
13

14 - Prescription;  
15  
16

17 3. The Naranjo algorithm was applied to classify the cause of the ADE: proven, probable,  
18 possible, or doubtful;<sup>9</sup>  
19  
20

21 4. Analysis of all proven, probable and possible ADEs.  
22  
23

24 The study included only unavoidable ADEs, that is, only those that occurred during  
25 normal use of a drug, and not the result of a human error,<sup>10</sup> as well as those classified as  
26 moderate to severe according to the World Health Organization guidelines.<sup>11</sup> The study  
27 protocol was reviewed and approved by the Ethics Committee of the institution prior to the  
28 start of data collection (protocol number 485/56/2005). Because of the observational nature  
29 of the study, without any interference in therapy, informed consent was waived.  
30  
31  
32  
33  
34  
35  
36  
37

38 Statistical analysis was performed using SPSS and Microsoft Excel, obtaining the  
39 odds ratios (OR) by logistic regression. We used a linear regression model for the variables,  
40 "ADEs", "Presence of chronic disease", "Age", "Gender", "Number of drugs"  
41 (independent), and "PICU stay" (dependent). Significance of differences between means  
42 was obtained with the T test. Variables involving time were analyzed using the Kaplan-  
43 Meier method, and  $p < 0.05$  was considered statistically significant. We calculated the  
44 positive predictive value of pre-established parameters as triggers for the search of adverse  
45 events.  
46  
47  
48  
49  
50  
51  
52  
53  
54  
55  
56  
57  
58  
59  
60

## RESULTS

In our pilot survey, we identified 20 adverse events of moderate to severe intensity over a period of 22 days in March 2004, which we calculated to represent at least 5 events per 100 patient-days.

In our actual study, there were 244 admissions to the PICU during the period between October 1, 2005 and March 31, 2006. Four patients were excluded because they were adult organ donors and one patient was excluded due to age > 18 years. We analyzed the remaining 239 patients, representing a total of 1818 days of PICU hospitalization. The average length of stay was 7.6 days with a standard deviation (SD) of 9.5 days.

The mean age was 67.5 months (median 51 months, range 1-243), and 113 patients (47.2%) were younger than 48 months. Ninety-four of the 239 patients were male (39.3%). Only 39 of the 239 patients did not have a chronic disease at admission (16.3%); the most prevalent chronic diseases were cancer (n = 48, 20%), hepatic disease (n = 37, 15.4%), neurological disease (n = 28, 11.7%), respiratory disease (n = 28, 11.7 %), and cardiac disease (n = 12, 5%).

There were 110 proven, probable, or possible ADEs in 84 patients (35.1%) during the six month study period, resulting in a rate of 60.5 ADEs / 1,000 patient-days; 21 patients had more than one ADE. Thirty-nine ADEs were prevalent at admission and the remaining 71 (64.5%) occurred subsequent to PICU admission (Table 1). The identification of these 110 ADEs was triggered by 138 positive occurrences of indicative parameters (triggers) as shown in table 2, with their predictive positive values. Table 3 shows the observed ADEs and related drugs.

The drug classes involved in ADEs were: antibiotics (n = 41), diuretics (24), antiseizures (23), sedatives and analgesics (17), steroids (18), antihypertensives (9),

1  
2  
3 bronchodilators (8), gastric protectors (3), immunosuppressives (4), vasoactive drugs (5),  
4  
5 hormonal analogues (4), antipyretics (4), and others (5). There was a significant  
6  
7 difference between the mean length of stay (LOS) between patients with and without ADEs  
8  
9 (11.1 vs. 5.3 days,  $p < 0.0001$ ). Using multivariate linear regression, we attempted to define  
10  
11 the relationship between several variables and LOS. The only independent variables  
12  
13 remaining in the final model that affect LOS were the number of ADEs ( $p = 0.089$ , slope  
14  
15 coefficient 1.49) and the number of drugs ( $p < 0.001$ , slope coefficient 0.83,  $R^2 = 0.104$ );  
16  
17 other variables did not show any significant relationship. If significant, the slope coefficient  
18  
19 indicates that an ADE would result in an increase in PICU hospitalization by 1.49 days. We  
20  
21 hypothesized that this may be relevant with a longer period of observation. We extrapolated  
22  
23 our results to 480 patients (the expected number of admissions in one year); using the  
24  
25 obtained standard deviations of 9.5 for the dependent variable (LOS) and 0.72 for the  
26  
27 independent variable (ADE), we determined that the probability of increasing the LOS by  
28  
29 1.5 days for each ADE is 70%. For two years (~1000 patients), the probability reached  
30  
31 94%.  
32  
33  
34  
35  
36  
37

38  
39 Gender, the presence of chronic disease, and age, were analyzed as possible risk  
40  
41 factors for the incidence of ADEs; for males, the odds ratio (OR) was 1.46 ( $p = 0.16$ ); for  
42  
43 the presence of a chronic disease, the OR was 1.47 ( $p = 0.30$ ), and none of the individual  
44  
45 chronic conditions displayed an increased risk for ADEs; however, patient age less than 48  
46  
47 months proved to be a significant risk factor, with an OR of 1.84 (95% CI: 1.07 - 3.15,  $p =$   
48  
49 0.025).  
50  
51

52  
53 The number of drugs received by each patient correlated with the number of ADEs  
54  
55 ( $R^2 = 0.13$ ,  $p < 0.0001$ ). The likelihood of at least one ADE became significant when the  
56  
57 patient was given at least 5 drugs at the same time (OR 2.19 – 95% CI: 1.14 – 4.20,  $p =$   
58  
59  
60



1  
2  
3 0.018). We observed a linear elevation of the chance of an occurrence of an ADE as the  
4 patient was administered more medications, achieving an OR of 7.26 (95% CI: 2.77 - 19.1,  
5  
6  
7  
8  $p < 0.0001$ ) with 11 concomitant drugs. The same was observed for the occurrence of more  
9  
10 than one ADE (Table 4).

11  
12  
13 In our multivariate analysis, we observed a positive interaction in patients aged less  
14 than 48 months and concomitant administration of at least five drugs (OR = 2.05, 95% CI:  
15 1.18-3.57,  $p = 0.01$ ) or the use of five drugs (OR = 2.46; CI 95%: 1.26-4.80,  $p = 0.008$ ), in  
16  
17 the occurrence of at least one ADE. This interaction remained significant, with discrete  
18  
19 elevation of the OR until 9 concomitant drugs were administered (OR = 2.03, 95% CI:  
20  
21 1.15-3.60,  $p = 0.014$ , for age < 48 months; and OR = 4.69, 95% CI: 2.41-9.15,  $p < 0.0001$   
22  
23 for the use of 9 drugs). There was no significant interaction between use of five or more  
24  
25 drugs and the occurrence of more than one ADE.  
26  
27  
28  
29  
30

31  
32 In addition, mean “survival” without ADEs (time from admittance to the PICU until  
33  
34 the occurrence of an ADE) was 19 days for patients older than 48 months and 11.2 days for  
35  
36 patients younger than 48 months ( $p = 0.017$ ).  
37  
38  
39  
40

## 41 **DISCUSSION**

42  
43 Determining the occurrence of adverse events in an intensive care environment is a  
44  
45 complex undertaking. The symptoms of the event may overlap the underlying disease and  
46  
47 may be caused by several unrelated factors including the pharmacokinetic profile of the  
48  
49 drug, unknown drug allergies of each patient, or human error. These difficulties may serve  
50  
51 as an explanation for why many events are not recognized as ADEs. Frequently, other  
52  
53 drugs are administered in an attempt to solve the problem created by the ADE, without the  
54  
55 specific diagnosis of an ADE. While some events are easily attributed to certain drugs,  
56  
57  
58  
59  
60

1  
2  
3 there are several possible and poorly documented events and some are completely unknown  
4 and rare. There are also a multitude of patient-specific risk-factors leading to the occurrence  
5 of an ADE, including age and certain comorbidities, such as the presence of renal or  
6 hepatic impairment. In addition drug-related factors such as toxicity, time of administration,  
7 dosage, and duration of use, are variables that can also impact the probability of ADEs. In  
8 addition, new drugs that have just completed phase III clinical trials may not have been  
9 powered to detect rare events.<sup>12</sup> In general, if we don't look for ADEs, it is unlikely that we  
10 will find them.<sup>13</sup>

11  
12  
13  
14  
15  
16  
17  
18  
19  
20  
21  
22 In the absence of reliable empirical methods for detection of ADEs, formal and  
23 logical tools can help differentiate an ADE from a symptom caused by exacerbations in a  
24 patient's underlying condition. The most widely accepted formal instrument to obtain this  
25 is the Naranjo algorithm; however, this tool is also not without bias: in our sample, only 5  
26 of 110 ADEs were classified as "proven" or definite (scores 9 and 10). Therefore, some  
27 included events may not have been ADEs. However, to prove an ADE according to the  
28 algorithm, it is necessary to re-administer the drug and observe the event again, or obtain  
29 serum levels that are known to be toxic. The first option is strongly discouraged and the  
30 second may be technically impossible or unavailable. However, we excluded the "doubtful"  
31 events (score equal to or less than 1) from our analysis and some of these events may have  
32 actually been ADEs.

33  
34  
35  
36  
37  
38  
39  
40  
41  
42  
43  
44  
45  
46  
47  
48 The incidence of observed events (35.1% of admissions) is much higher than those  
49 reported in adult patients hospitalized in ICUs (around 9%).<sup>14</sup> Furthermore, we found that  
50 younger children under the age of 48 months, which constitute approximately half the  
51 patient sample, were more likely to have ADEs. This was particularly significant with the  
52 administration of over five drugs at the same time, and also resulted in an ADE earlier in  
53  
54  
55  
56  
57  
58  
59  
60

1  
2  
3 the patient's ICU stay. The high incidence of ADEs also highlights the importance of an  
4 active search focused on triggers to detect ADEs in children: Holdsworth et al reported  
5 ADE rates of 6 per 100 admissions (ICU and pediatric ward, determined using a chart  
6 review by a pharmacist).<sup>15</sup> Takata et al. performed a search focused on triggers and reported  
7 11.1 events/100 inpatients, almost double that of the retrospective study. These authors  
8 indicated that performing a search focused on specific circumstances associated with ADEs  
9 in specific elements of the patient's chart can increase the rates of observed ADEs.<sup>16</sup> We  
10 wish to highlight that our study evaluated severely ill children under intensive care  
11 receiving multiple drugs (up to 18), and the chances of developing an ADE is therefore,  
12 more likely. In addition, comparing event rates is also challenging and potentially  
13 misleading as definitions of ADEs are unclear among studies, ranging from a benign and  
14 transient alteration of electrolytes to vital organ damage.<sup>10</sup>

15  
16 We investigated whether ADEs may have an impact on the LOS in the PICU; if an  
17 increase was observed, we can conclude that the ADEs caused harm to the patient. Our  
18 sample did not have the power to implicate ADEs as a causative factor in prolonging PICU  
19 stays by 1.5 days; however, calculations based on standard deviations observed in our  
20 sample showed a high probability that this would be true in a longer-term study. In addition  
21 to patient harm, there are significant costs associated with patient stays in the ICU: An  
22 increase of 1.5 days per event results in an additional 330 days per year. Estimating cost at  
23 \$600.00 (American dollars) each day, ADEs amount to \$198,000 per year, which is a  
24 considerable sum for our public health system. In principle, the events occurred as a result  
25 of habitual use of drugs and were therefore "inevitable", however, a systematic approach  
26 could convert some ADEs from inevitable to avoidable. A good example cited by Kane-  
27 Gill et al<sup>10</sup> describes bleeding caused by the correct dose of heparin in a patient being

1  
2  
3 monitored by partial thromboplastin time and would be classified as inevitable. If an  
4 investigation identified that the laboratory has changed their method for thromboplastin  
5 time and failed to communicate the necessary adjustment, the error would become  
6 preventable. More studies on pharmacokinetics and drug interactions in children are  
7 required to define optimal dosing regimens and reduce ADEs.  
8  
9  
10  
11  
12  
13

## 14 15 16 17 **CONCLUSIONS**

18  
19 The use of focused and active search engines can provide a systematic approach to identify  
20 ADEs in PICUs. The use of multiple drugs as well as lower patient age favors the  
21 occurrence of ADEs, which in turn may result in increasing the length of PICU  
22 hospitalization.  
23  
24  
25  
26  
27  
28  
29  
30  
31  
32  
33

## 34 **REFERENCES**

- 35  
36 1. Niederhauser VP. Prescribing for children: issues in pediatric pharmacology. *Nurse*  
37 *Pract* 1997;22(3):16-18.  
38  
39 2. Hussain E, Kao E. Medication safety and transfusion errors in the ICU and beyond.  
40 *Crit Care Clin* 2005;21:91-110.  
41  
42 3. Wilson RM, Runciman WB, Gibberd RW, Harrison BT, Newby L, Hamilton JD.  
43 The Quality in Australian Health Care Study. *Med J Aust* 1995;163:458-471.  
44  
45 4. Kaushal R, Bates DW, Landrigan C, et al. Medication errors and adverse drug  
46 events in pediatric inpatients. *JAMA* 2001;285:2114-2120.  
47  
48  
49  
50  
51  
52  
53  
54  
55  
56  
57  
58  
59  
60

- 1  
2  
3 5. Impicciatore P, Choonara I, Clarkson A, Provasi D, Pandolfini C, Bonati M.  
4  
5 Incidence of adverse drug reactions in paediatric in/out-patients: a systematic review and  
6  
7 meta-analysis of prospective studies. *Br J Clin Pharmacol* 2001;52:77-83.
- 8  
9  
10 6. Gill AM, Leach HJ, Hughes J, Barker C, Nunn AJ, Choonara I. Adverse drug  
11  
12 reactions in a paediatric intensive care unit. *Acta Paediatr* 1995;84:438-441.
- 13  
14  
15 7. Rozich JD, Haraden CR, Resar RK. Adverse drug event trigger tool: a practical  
16  
17 methodology for measuring medication related harm. *Qual Saf Health Care*  
18  
19 2003;12(3):194–200.
- 20  
21  
22 8. Resar RK, Rozich JD, Classen DC. Methodology and rationale for the measurement  
23  
24 of harm with trigger tools. *Qual Saf Health Care* 2003;12(suppl 2):ii39 –ii45.
- 25  
26  
27 9. Naranjo CA, Busto U, Sellers EM, et al. A method for estimating the probability of  
28  
29 adverse drug reactions. *Clin. Pharmacol. Ther* 30 (2): 239–245.
- 30  
31  
32 10. Kane-Gill SL, Kirisci L, Verrico MM, Rothschild JM. Analysis of risk factors for  
33  
34 adverse drug events in critically ill patients. *Crit Care Med* 2012;40(3):823-8.
- 35  
36  
37 11. World Health Organization (WHO). Council for International Organizations of  
38  
39 Medical Sciences. Guidelines for preparing core clinical safety information on drug from  
40  
41 CIOMS Working Group III. Geneva; 1995.
- 42  
43  
44 12. Brown SD Jr, Landry FJ. Recognizing, reporting, and reducing adverse drug  
45  
46 reactions. *South Med J* 2001;94(4):370-3.
- 47  
48  
49 13. Kelly WN. How Can I Recognize an Adverse Drug Event. Available online at:  
50  
51 <http://www.medscape.org/viewarticle/569794>. Accessed Feb 1, 2012.
- 52  
53  
54 14. Vargas E, Terleira A, Hernando F, Perez E, Cordon C, Moreno A, Portoles A.  
55  
56 Effect of adverse drug reactions on length of stay in surgical intensive care units. *Crit Care*  
57  
58 *Med* 2003;31(3):694-8.
- 59  
60

15. Holdsworth MT, Fichtl RE, Behta M, et al. Incidence and impact of adverse drug events in pediatric inpatients. *Arch Pediatr Adolesc Med* 2003;157(1):60–65.

16. Takata GS, Mason W, Taketomo C, Logsdon T, Sharek PJ. Development, testing, and findings of a pediatric-focused trigger tool to identify medication-related harm in US children's hospitals. *Pediatrics* 2008;121(4):e927-3.

*Table 1 – Distribution of prevalent and incident adverse events according to causality.*

| ADE      | Prevalent | Incident | TOTAL |
|----------|-----------|----------|-------|
| Proven   | 0         | 5        | 5     |
| Probable | 12        | 32       | 44    |
| Possible | 27        | 34       | 61    |
| TOTAL    | 39        | 71       | 110   |

*Table 2 – Indicative parameters of ADEs used for active search.*

| Indicative parameters (“Triggers”)      | Number of occurrences | Positive predictive value |
|-----------------------------------------|-----------------------|---------------------------|
| Hematological alterations               | 8                     | 5.79%                     |
| Biochemical alterations                 | 64                    | 46.37%                    |
| Cardiac alterations                     | 17                    | 12.3%                     |
| Antihistamines                          | 5                     | 3.62%                     |
| Corticoids                              | 2                     | 1.45%                     |
| Allergic reactions                      | 11                    | 7.97%                     |
| Non-programmed endotracheal intubation  | 1                     | 0.72%                     |
| Level of consciousness degradations     | 2                     | 1.45%                     |
| Drug interactions                       | 8                     | 5.80%                     |
| Antiseizures prescription               | 2                     | 1.45%                     |
| Drug intolerance                        | 0                     | 0%                        |
| Non-programmed suspension of drug       | 1                     | 0.72%                     |
| Fever                                   | 0                     | 0%                        |
| Sudden death                            | 0                     | 0%                        |
| Serum level alteration                  | 0                     | 0%                        |
| Aminophylline / adrenaline prescription | 0                     | 0%                        |
| Antidotes prescription                  | 3                     | 2.17%                     |

|        |    |        |
|--------|----|--------|
| Others | 14 | 10.14% |
|--------|----|--------|

Table 3 – Observed adverse drug events (ADEs) and related drugs

| Adverse Drug Events (ADEs)             | N  | Related drugs                                                                                                                                |
|----------------------------------------|----|----------------------------------------------------------------------------------------------------------------------------------------------|
| Hyponatremia                           | 27 | furosemide, fentanyl, carbamazepine, vigabatrin topiramate, hydrochlorothiazide, somatostatin, vancomycin, rifampicin, ranitidine, phenytoin |
| Hyperglycemia                          | 17 | dexamethasone, hydrocortisone, methylprednisolone, terbutaline, tacrolimus                                                                   |
| Hypokalemia                            | 13 | amphotericin b, terbutaline, furosemide, ranitidine                                                                                          |
| Skin rash and urticaria                | 11 | vancomycin, dipyrrone, cefepime, ceftriaxone, levetiracetam, dipyrrone, rasburicase                                                          |
| Hypoventilation/desaturation of oxygen | 6  | midazolam, propofol, fentanyl, morphine, diazepam                                                                                            |
| Bradycardia                            | 4  | midazolam                                                                                                                                    |
| Hypotension                            | 4  | midazolam, furosemide, thiopental, chlorpromazine                                                                                            |
| Liver enzyme abnormalities             | 4  | meropenem, carbamazepine, amlodipine, carvedilol, clonidine, amitriptyline, phenobarbital                                                    |
| Hypertension                           | 3  | prednisone tacrolimus, dopamine                                                                                                              |
| Increased BUN and creatinine           | 3  | vancomycin, tacrolimus                                                                                                                       |
| Seizure                                | 2  | hydrocortisone, liposomal amphotericin B, cefepime                                                                                           |
| Tachycardia                            | 2  | terbutaline                                                                                                                                  |
| Anemia                                 | 2  | ketoprofen, paracetamol                                                                                                                      |
| Extrasystole                           | 2  | carvedilol, terbutaline                                                                                                                      |
| Increased number of platelets          | 2  | Meropenem, ceftriaxone                                                                                                                       |
| Vomiting                               | 2  | Nitroprusside, tacrolimus                                                                                                                    |
| Cardiorespiratory arrest               | 1  | dipyrrone                                                                                                                                    |
| Thrombocytopenia                       | 1  | dipyrrone                                                                                                                                    |
| Apnea                                  | 1  | phenytoin                                                                                                                                    |
| Leukopenia                             | 1  | imipenem                                                                                                                                     |
| Stevens-Johnson syndrome               | 1  | trimethoprim / sulfamethoxazole                                                                                                              |
| Eosinophilia                           | 1  | ceftriaxone                                                                                                                                  |

Table 4 – Odds ratios related to the concomitant use of medications.

| Number of drugs | Occurrence of at least one ADE |            |          | Occurrence of more than one ADE |            |          |
|-----------------|--------------------------------|------------|----------|---------------------------------|------------|----------|
|                 | <i>Odds ratio</i>              | 95% CI     | <i>P</i> | <i>Odds ratio</i>               | 95% CI     | <i>P</i> |
| 5               | 2.19                           | 1.14-4.2   | 0.018    | 2.38                            | 0.67-8.38  | 0.175    |
| 6               | 3.0,3                          | 1.69-5.40  | 0.0002   | 3.28                            | 1.06-10.07 | 0.037    |
| 7               | 3.69                           | 2.11-6.46  | < 0.0001 | 2.95                            | 1.14-7.60  | 0.025    |
| 8               | 3.84                           | 2.24-6.80  | < 0.0001 | 3.35                            | 1.34-8.35  | 0.009    |
| 9               | 4.40                           | 2.29-8.45  | < 0.0001 | 3.14                            | 1.24-7.90  | 0.015    |
| 10              | 6.48                           | 2.85-14.77 | < 0.0001 | 3.69                            | 1.36-9.99  | 0.010    |
| 11              | 7.26                           | 2.77-19.01 | < 0.0001 | 5.55                            | 1.98-15.52 | 0.001    |



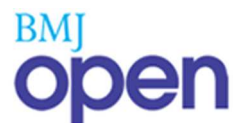

**ADVERSE DRUG EVENTS IN A PEDIATRIC INTENSIVE CARE  
UNIT: A PROSPECTIVE COHORT**

|                                 |                                                                                                                                                                                                                                                                                                                                                                                                                                                                                                                                                               |
|---------------------------------|---------------------------------------------------------------------------------------------------------------------------------------------------------------------------------------------------------------------------------------------------------------------------------------------------------------------------------------------------------------------------------------------------------------------------------------------------------------------------------------------------------------------------------------------------------------|
| Journal:                        | <i>BMJ Open</i>                                                                                                                                                                                                                                                                                                                                                                                                                                                                                                                                               |
| Manuscript ID:                  | bmjopen-2012-001868.R1                                                                                                                                                                                                                                                                                                                                                                                                                                                                                                                                        |
| Article Type:                   | Research                                                                                                                                                                                                                                                                                                                                                                                                                                                                                                                                                      |
| Date Submitted by the Author:   | 22-Nov-2012                                                                                                                                                                                                                                                                                                                                                                                                                                                                                                                                                   |
| Complete List of Authors:       | Silva, Dafne; Faculty of Medicine, University of Sao Paulo, FMUSP, Instituto da Criança<br>Araujo, Orlei; Instituto de Oncologia Pediatrica, Intensive Care Unit<br>Arduini, Rodrigo; Instituto de Oncologia Pediatrica (GRAAC/IOP/UNIFESP), Intensive Care Unit<br>Alonso, Carolina; Instituto de Oncologia Pediatrica (GRAAC/IOP/UNIFESP), Intensive Care Unit<br>Shibata, Audrey; Faculty of Medicine, University of Sao Paulo, FMUSP, Instituto da Criança<br>Troster, Eduardo; Faculty of Medicine, University of Sao Paulo, FMUSP, Instituto da Criança |
| <b>Primary Subject Heading</b>: | Intensive care                                                                                                                                                                                                                                                                                                                                                                                                                                                                                                                                                |
| Secondary Subject Heading:      | Paediatrics, Pharmacology and therapeutics                                                                                                                                                                                                                                                                                                                                                                                                                                                                                                                    |
| Keywords:                       | Paediatric intensive & critical care < ANAESTHETICS, Adverse events < THERAPEUTICS, Toxicity < THERAPEUTICS                                                                                                                                                                                                                                                                                                                                                                                                                                                   |
|                                 |                                                                                                                                                                                                                                                                                                                                                                                                                                                                                                                                                               |

SCHOLARONE™  
Manuscripts

only

**TITLE PAGE****ADVERSE DRUG EVENTS IN A PEDIATRIC INTENSIVE CARE UNIT: A PROSPECTIVE COHORT**

Correspondent author: Orlei Ribeiro de Araujo.  
Address: Rua Botucatu 743 CEP 04023062 São Paulo- SP- Brazil  
Phone: +55115080 8400 – e-mail: [orlei@uol.com.br](mailto:orlei@uol.com.br)

**Authors:**

**Dafne C. B. Silva** – MD, Master in Pediatrics, Instituto da Criança, Faculty of Medicine, University of Sao Paulo, FMUSP, Brazil. [dafnechs@gmail.com](mailto:dafnechs@gmail.com)

**Orlei R. Araujo** - MD, Master in Pediatrics, Pediatric Oncology Institute (GRAACC/IOP), Federal University of Sao Paulo, Brazil. [orlei@uol.com.br](mailto:orlei@uol.com.br)

**Rodrigo G. Arduini** - MD, Pediatric Oncology Institute (GRAACC/IOP), Federal University of Sao Paulo, Brazil. [rodrigogenaro@gmail.com](mailto:rodrigogenaro@gmail.com)

**Carolina F. R. Alonso** - MD, Pediatric Oncology Institute (GRAACC/IOP), Federal University of Sao Paulo, Brazil. [carolinaalonso13@gmail.com](mailto:carolinaalonso13@gmail.com)

**Audrey R. O. Shibata** – MD, Instituto da Criança, Faculty of Medicine, University of Sao Paulo, FMUSP, Brazil. [audrey.shibata@gmail.com](mailto:audrey.shibata@gmail.com).

**Eduardo J. Troster.** PhD, Instituto da Criança, Faculty of Medicine, University of Sao Paulo, FMUSP, Brazil. [troster@einstein.br](mailto:troster@einstein.br)

**Institution:**

Instituto da Criança - Faculty of Medicine, University of Sao Paulo, FMUSP, Brazil.  
Adress: Av. Dr. Eneas Carvalho de Aguiar, 647, São Paulo - SP - Brasil CEP - 05403.000 –  
Phone: +5511 2661- 8500  
Home page: <http://icr.usp.br/>

**Key Words:** drug toxicity; pharmacovigilance; drug monitoring; intensive care; pediatrics; patient safety.

## ABSTRACT

**Objectives:** To describe adverse drug events (ADEs) in children under intensive care, identify risk factors and tools that can detect ADEs early, and the impact on length of stay (LOS).

**Design:** Prospective, observational study.

**Setting:** Pediatric intensive care unit of a tertiary care teaching hospital.

**Patients:** 239 patients with a mean age of 67.5 months representing 1818 days of hospitalization in intensive care unit .

**Interventions:** Active search of charts and electronic patient records using triggers. The statistical analysis involved linear and logistic regression.

**Measurements and Main Results:** The average LOS was 7.6 days. There were 110 proven, probable, and possible ADEs in 84 patients (35.1%). We observed 138 instances of triggers. The major classes of drugs associated with events were: antibiotics (n = 41), diuretics (n = 24), antiseizures (n = 23), sedatives and analgesics (n = 17), and steroids (n = 18). The number of drugs administered was most related to the occurrence of ADEs and also to the length of stay ( $p < 0.001$ ). The occurrence of an ADE may result in an increase in the length of stay by 1.5 days per event, but this was not statistically significant in this sample. Patient aged less than 48 months also proved to be at significant risk for ADEs, with an odds ratio of 1.84 (confidence interval - 95% CI - 1.07 to 3.15,  $p = 0.025$ ). The number of drugs administered also correlated with the number of ADEs ( $p < 0.0001$ ). The chance of having at least one ADE increased linearly as the patient was administered more drugs.

1  
2  
3 **Conclusions:** The use of multiple drugs as well as lower patient age favors the occurrence  
4 of ADEs. The active search described here provides a systematic approach to this problem.  
5  
6  
7  
8  
9

## 10 INTRODUCTION

11  
12 The use of medication in children and infants is a matter of great concern largely  
13 due to the vulnerability of their constantly changing and developing homeostasis, as well as  
14 the unique mechanisms by which different children respond to injuries. There are important  
15 differences in absorption, distribution, metabolism and excretion of drugs during childhood  
16 and early adolescence.<sup>1</sup> In addition, several medications have not exhibited safety in the  
17 pediatric age group, while others are prescribed differently than recommended for adults;  
18 key differences include dose and frequency of administration, presentation of the drug,  
19 route of administration, or indication for use in childhood (i.e. "off-label" use), and each of  
20 these factors can vary depending on the age of the child.<sup>2</sup> Most of times, recommended  
21 doses of drugs used in children are based on extrapolations from adult doses, related only to  
22 weight, body surface area, and age, often ignoring their pharmacokinetic and  
23 pharmacodynamic properties; this results in increased susceptibility of children to drug-  
24 related adverse events.<sup>1-4</sup>  
25  
26  
27  
28  
29  
30  
31  
32  
33  
34  
35  
36  
37  
38  
39  
40  
41  
42

43 Reports documenting the incidence of adverse drug events in the pediatric  
44 population range from 4.3% to 16.7%; 12.2% of these events being serious in nature, with  
45 high morbidity and mortality.<sup>5</sup> Hospitalized children may be at a higher risk of an adverse  
46 event, as doses, drug safety, and effectiveness are often difficult to determine.<sup>6</sup> Kaushal  
47 and colleagues identified that the potential frequency of ADEs in children is three times  
48 higher than a previous study focused on ADEs in adults, however, the rate of avoidable  
49 ADEs was similar.<sup>4</sup> In intensive care units, multiple, potentially hazardous drugs are  
50  
51  
52  
53  
54  
55  
56  
57  
58  
59  
60

1  
2  
3 routinely administered, such as inotropes, sedation medications, analgesia, and antibiotics;  
4  
5 as the risk of an ADE increases by 1.7% for each additional drug used,<sup>5</sup> it is far more likely  
6  
7 that adverse reactions will occur in the ICU.  
8  
9

10 There are few studies documenting safety in drug administration in children in the  
11 ICU. The primary objective of this study was to describe ADEs in children admitted to the  
12 pediatric ICU (PICU) of a tertiary care hospital in Sao Paulo, Brazil. As secondary  
13 objectives, we attempted to identify risk factors for such events and tools that could detect  
14 them early as well as determine if there was impact on LOS.  
15  
16  
17  
18  
19  
20  
21  
22  
23

## 24 MATERIALS AND METHODS

25  
26 We conducted a preliminary survey over a period of 22 days in March 2004 to  
27 identify the number of admissions required to effectively report ADEs in the PICU, a unit  
28 of 13 beds, with average occupation of 80%. Based on the results of this survey, we  
29 determined that it would then be necessary to study 150 admissions to reach a stable  
30 estimate of the incidence of ADEs and explore possible risk factors using a multivariate  
31 analysis (approximately 10 ADEs for each variable potentially associated). The study  
32 population consisted of consecutive admissions to the PICU between October 1, 2005 and  
33 March 31, 2006. The strategy to identify ADEs was through an active search, using pre-  
34 established parameters ("triggers"). A "trigger" can be defined as an occurrence, prompt, or  
35 flag, found when reviewing a patient's medical chart, that requires further investigation to  
36 determine the presence or absence of an adverse event.<sup>7,8</sup> Using this method, specific  
37 events, such as prescription or abrupt discontinuation of certain medications, prescription of  
38 antidotes, and some laboratory tests, serve as indicators for further investigation. Several  
39 triggers have been described in the literature,<sup>8</sup> and therefore we chose and adapted the ones  
40  
41  
42  
43  
44  
45  
46  
47  
48  
49  
50  
51  
52  
53  
54  
55  
56  
57  
58  
59  
60

1  
2  
3 that seemed more consistent with the drugs commonly used in our PICU. Table 1 shows  
4 these triggers and the rationale for their use. The positive predictive value (PPV) of each  
5 trigger was calculated as the number of times that each trigger identified an ADE, divided  
6 by the total number of times the triggers were identified in the active search.  
7  
8  
9

10 The following methodology was undertaken for active search:

11  
12  
13 1. The admission form for each new patient in the PICU was entered by two trained  
14 intensive care pediatricians; data were reviewed by 2 authors (Drs. Silva and Shibata) and  
15 consolidated in agreement.  
16  
17  
18  
19  
20  
21

22 2. The following records for each patient were reviewed, guided by triggers indicative of  
23 adverse events:  
24

25 - Laboratory tests (electronic database);  
26

27 - Clinical annotations;  
28

29 - Nursing annotations;  
30

31 - Prescription;  
32  
33

34 3. The Naranjo algorithm was applied to classify the cause of the ADE: proven, probable,  
35 possible, or doubtful;<sup>9</sup>  
36  
37  
38

39 4. Analysis of all proven, probable and possible ADEs.  
40  
41  
42

43 The study included only unavoidable ADEs, that is, only those that occurred during  
44 normal use of a drug, and not the result of a human error,<sup>10</sup> as well as those classified as  
45 moderate to severe according to the World Health Organization (WHO) guidelines: By this  
46 definition (WHO), ADE is any detrimental or undesirable event, unintended, which appears  
47 after administration of a drug at doses normally used for prophylaxis, diagnosis or  
48 treatment of a disease. A moderate reaction is one that requires modification of therapy and  
49 may require specific treatment; a severe reaction is potentially fatal and requires specific  
50  
51  
52  
53  
54  
55  
56  
57  
58  
59  
60

1  
2  
3 treatment, requires or prolongs hospitalization.<sup>11</sup> We analyzed only those ADEs that  
4  
5 appeared after admission. ADEs that appeared after admission but were related to drugs  
6  
7 that the patient was receiving before being admitted were defined as due to “prevalent  
8  
9 drug”. This definition eliminated, for example, ADEs due to chemotherapy already present  
10  
11 before admission in patients with cancer. ADEs related to drugs introduced after admission  
12  
13 were classified as due to "incident drug". The study protocol was reviewed and approved  
14  
15 by the Ethics Committee of the institution prior to the start of data collection (protocol  
16  
17 number 485/56/2005). Because of the observational nature of the study, without any  
18  
19 interference in therapy, informed consent was waived.  
20  
21  
22  
23

24  
25 Statistical analysis was performed using SPSS and Microsoft Excel, obtaining the  
26  
27 odds ratios (OR) by logistic regression. A multinomial logistic regression model was  
28  
29 performed with the variables "Presence of chronic disease", "Age", "Gender", "Number of  
30  
31 drugs" (independent) and "ADEs" (dependent). We chose the variables “Age” and “number  
32  
33 of drugs” because they have been significantly correlated with the incidence of ADEs.<sup>5</sup>  
34  
35 Some studies have shown a lower risk for ADEs in male children.<sup>12</sup> Chronic illness is an  
36  
37 important variable due to the continuous use of various drugs and the presence of organ  
38  
39 dysfunction. We used also a linear regression model for the variables "ADEs", "Presence of  
40  
41 chronic disease", "Age", "Gender", "Number of drugs" (independent), and "LOS"  
42  
43 (dependent). Significance of differences between means was obtained with the T test.  
44  
45 Variables involving time were analyzed using the Kaplan-Meier method, and  $p < 0.05$  was  
46  
47 considered statistically significant.  
48  
49  
50  
51  
52  
53  
54

## 55 RESULTS

56  
57  
58  
59  
60

1  
2  
3 In our pilot survey, we identified 20 adverse events of moderate to severe intensity  
4 over a period of 22 days in March 2004, which we calculated to represent at least 5 events  
5 per 100 patient-days.  
6  
7  
8  
9

10 In our actual study, there were 244 admissions to the PICU during the period  
11 between October 1, 2005 and March 31, 2006. Four patients were excluded because they  
12 were adult living-donors for liver transplant, and one patient was excluded due to age > 18  
13 years. We analyzed the remaining 239 patients, representing a total of 1818 days of PICU  
14 hospitalization. The average length of stay was 7.6 days with a standard deviation (SD) of  
15 9.5 days.  
16  
17  
18  
19  
20  
21  
22  
23

24 The mean age was 67.5 months (median 51 months, range 1-243), and 113 patients  
25 (47.2%) were younger than 48 months. Ninety-four of the 239 patients were male (39.3%).  
26 Only 39 of the 239 patients did not have a chronic disease at admission (16.3%); the most  
27 prevalent chronic diseases were cancer (n = 48, 20%), hepatic disease (n = 37, 15.4%),  
28 neurological disease (n = 28, 11.7%), respiratory disease (n = 28, 11.7 %), and cardiac  
29 disease (n = 12, 5%). Admissions were mostly due to respiratory failure (n = 83),  
30 postoperative of neurosurgical, general, or cardiac surgery (n = 52), decreased level of  
31 consciousness (n = 14), or sepsis/septic shock (n = 28). Other causes were seizures,  
32 digestive bleeding, dehydration, renal failure, hypertension, and others.  
33  
34  
35  
36  
37  
38  
39  
40  
41  
42  
43  
44  
45

46 We observed 138 occurrences of triggers, as shown in Table 2, with their predictive  
47 positive values. These triggers led to the identification of 110 proven, probable, or possible  
48 ADEs in 84 patients (35.1%) during the six month study period, resulting in a rate of 60.5  
49 ADEs / 1,000 patient-days; 21 patients had more than one ADE. Thirty-nine ADEs were  
50 due to prevalent drugs and the remaining 71 (64.5%) were related to drugs introduced after  
51  
52  
53  
54  
55  
56  
57  
58  
59  
60



1  
2  
3 PICU admission or “incidents” (Table 3). Table 4 shows the observed ADEs and related  
4  
5 drugs.  
6

7  
8 Gender, the presence of chronic disease, age, and administration of at least five  
9  
10 drugs were included in a multinomial logistic regression analysis as independent variables  
11  
12 for the incidence of ADEs (dependent variable); for males, the odds ratio (OR) was 1.31 ( $p$   
13  
14 = 0.33); for the presence of a chronic disease, the OR was 0.71 ( $p$  = 0.35), and none of the  
15  
16 individual chronic conditions displayed an increased risk for ADEs; however, patient age  
17  
18 less than 48 months proved to be a significant risk factor, with an OR of 2.1 (95% CI: 1.19  
19  
20 - 3.72,  $p$  = 0.01). There was a positive interaction in patients aged less than 48 months and  
21  
22 concomitant administration of at least five drugs (OR = 2.05, 95% CI: 1.18-3.57,  $p$  = 0.01)  
23  
24 in the occurrence of at least one ADE. This interaction remained significant, with discrete  
25  
26 elevation of the OR until 9 concomitant drugs were administered (OR = 2.03, 95% CI:  
27  
28 1.15-3.60,  $p$  = 0.014, for age < 48 months; and OR = 4.69, 95% CI: 2.41-9.15,  $p$  < 0.0001  
29  
30 for the use of 9 drugs).  
31  
32  
33  
34  
35

36  
37 In a bivariate analysis, the number of drugs received by each patient correlated with  
38  
39 the number of ADEs ( $R^2$  = 0.13,  $p$  < 0.0001). The likelihood of at least one ADE became  
40  
41 significant when the patient was given at least 5 drugs at the same time (OR 2.19 – 95% CI:  
42  
43 1.14 – 4.20,  $p$  = 0.018). We observed a linear elevation of the chance of an occurrence of an  
44  
45 ADE as the patient was administered more medications, achieving an OR of 7.26 (95% CI:  
46  
47 2.77 - 19.1,  $p$  < 0.0001) with 11 concomitant drugs. The same was observed for the  
48  
49 occurrence of more than one ADE (Table 5).  
50  
51

52  
53 There was a significant difference between the mean LOS between patients with  
54  
55 and without ADEs (11.1 vs. 5.3 days,  $p$  < 0.0001). In a bivariate linear regression model  
56  
57 (LOS as the dependent variable and ADEs as independent), the slope coefficient was 2.75  
58  
59  
60

1  
2  
3 (p = 0.001), meaning that each ADE corresponded to an increase of 2.75 days in the LOS.  
4  
5  
6 However, this increase was not maintained when other confounding variables were added  
7  
8 in the multivariate regression model. The only independent variables remaining in the final  
9  
10 model that affected LOS were the number of ADEs (p = 0.089; slope coefficient 1.49) and  
11  
12 the number of drugs (p < 0.001; slope coefficient 0.83; R<sup>2</sup> = 0.104); The slope coefficient  
13  
14 could indicate an increase in LOS of 1.49 days for each ADE, if statistically significant, but  
15  
16 the study did not have the power to demonstrate it. A sample calculation showed that in  
17  
18 order for this fact to be significant in a larger sample, it would take 1000 patients to achieve  
19  
20 p < 0.05 with a power of 0.94, considering the observed standard deviation of 9.5 for the  
21  
22 dependent variable “LOS” and 0.72 for independent “number of ADEs”. Other variables  
23  
24 did not show any significant relationship.  
25  
26  
27  
28

29 In addition, mean “survival” without ADEs (time from admittance to the PICU until  
30  
31 the occurrence of an ADE) was 19 days for patients older than 48 months and 11.2 days for  
32  
33 patients younger than 48 months (p = 0.017).  
34  
35

36 The drug classes involved in ADEs were: antibiotics (n = 41), diuretics (24),  
37  
38 antiseizures (23), sedatives and analgesics (17), steroids (18), antihypertensives (9),  
39  
40 bronchodilators (8), gastric protectors (3), immunosuppressives (4), vasoactive drugs (5),  
41  
42 hormonal analogues (4), antipyretics (4), and others (5).  
43  
44  
45  
46  
47

## 48 **DISCUSSION**

49  
50 Determining the occurrence of adverse events in an intensive care environment is a  
51  
52 complex task. The symptoms of the event may overlap the underlying disease and may be  
53  
54 caused by several unrelated factors including the pharmacokinetic profile of the drug,  
55  
56 unknown drug allergies of each patient, or human error. These difficulties may serve as an  
57  
58  
59  
60

1  
2  
3 explanation for why many events are not recognized as ADEs. Frequently, other drugs are  
4 administered in an attempt to solve the problem created by the ADE, without the specific  
5 diagnosis. While some events are easily attributed to certain drugs, there are several  
6 possible and poorly documented events and some are completely unknown and rare. There  
7 are also a multitude of patient-specific risk-factors leading to the occurrence of an ADE,  
8 including age and certain comorbidities, such as the presence of renal or hepatic  
9 impairment. Drug-related factors such as toxicity, time of administration, dosage, and  
10 duration of use are variables that can also impact the probability of ADEs. In addition, new  
11 drugs that have just completed phase III clinical trials may not have been powered to detect  
12 rare events.<sup>13</sup> In general, if we don't look for ADEs, it is unlikely that we will find them.<sup>14</sup>  
13  
14  
15  
16  
17  
18  
19  
20  
21  
22  
23  
24  
25  
26

27 In the absence of reliable empirical methods for detection of ADEs, formal and  
28 logical tools can help differentiate an ADE from a symptom caused by exacerbations in a  
29 patient's underlying condition. The most widely accepted formal instrument to obtain this  
30 is the Naranjo algorithm; however, this tool is also not without bias: in our sample, only 5  
31 of 110 ADEs were classified as "proven" or definite (scores 9 and 10). Therefore, some  
32 included events may not have been ADEs. However, to prove an ADE according to the  
33 algorithm, it is necessary to re-administer the drug and observe the event again, or obtain  
34 serum levels that are known to be toxic. The first option is strongly discouraged and the  
35 second may be technically impossible or unavailable. However, we excluded the "doubtful"  
36 events (score equal to or less than 1) from our analysis and some of these events may have  
37 actually been ADEs.  
38  
39  
40  
41  
42  
43  
44  
45  
46  
47  
48  
49  
50  
51  
52

53 Most of our patients had chronic diseases, which may contribute to a higher  
54 incidence of ADEs, due to the use of multiple medications. This population of chronic  
55 patients reflects the current reality of Brazilian university hospitals. We observed no  
56  
57  
58  
59  
60

1  
2  
3 significant difference in ADE incidence between patients with and without chronic  
4 diseases, which can be explained by the exclusion of events prior to PICU admission and  
5  
6 was more likely related to the medications used regularly.  
7  
8  
9

10 The incidence of observed events (35.1% of admissions) is much higher than those  
11 reported in adult patients hospitalized in ICUs (around 9%).<sup>15</sup> Furthermore, we found that  
12 younger children under the age of 48 months, which constitute approximately half the  
13 patient sample, were more likely to have ADEs. This was particularly significant with the  
14 administration of over five drugs at the same time, and also resulted in an ADE earlier in  
15 the patient's ICU stay. The high incidence of ADEs also highlights the importance of an  
16 active search focused on triggers to detect ADEs in children: Holdsworth et al reported  
17 ADE rates of 6 per 100 admissions (ICU and pediatric ward, determined using a chart  
18 review by a pharmacist).<sup>16</sup> Takata et al. performed a search focused on triggers and reported  
19 11.1 events/100 inpatients, almost double that of the retrospective study. These authors  
20 indicated that performing a search focused on specific circumstances associated with ADEs  
21 in specific elements of the patient's chart can increase the rates of observed ADEs.<sup>17</sup> The  
22 methodology we used in this study (definition of triggers and daily search in the records of  
23 patients) is a simple way to perform an active search for ADEs. Triggers can be  
24 individualized for each hospital setting according to the most frequently used medications.  
25 PPVs can be determined through a simple calculation that assists in the choice of triggers  
26 that are most useful in each unit. We observed higher PPVs for biochemical alterations; in  
27 an automated process, the system of the laboratory itself could alert for possible ADEs.  
28  
29  
30  
31  
32  
33  
34  
35  
36  
37  
38  
39  
40  
41  
42  
43  
44  
45  
46  
47  
48  
49  
50  
51

52 We wish to highlight that our study evaluated severely ill children under intensive  
53 care receiving multiple drugs (up to 18), and the chances of developing an ADE is  
54 therefore, more likely. In addition, comparing event rates is also challenging and potentially  
55  
56  
57  
58  
59  
60

1  
2  
3 misleading as definitions of ADEs are unclear among studies, ranging from a benign and  
4  
5 transient alteration of electrolytes to vital organ damage.<sup>10</sup>  
6  
7

8 We investigated whether ADEs may have an impact on the LOS in the PICU. The  
9  
10 most important limitation of the study was that our sample did not have the power to  
11  
12 implicate ADEs as a causative factor in prolonging PICU stays by 1.5 days; however,  
13  
14 calculations based on standard deviations observed in our sample showed a high probability  
15  
16 that this would be true in a longer-term study. In addition to possible patient harm, there are  
17  
18 significant costs associated with patient stays in the ICU: An increase of 1.5 days per event  
19  
20 results in an additional 330 days per year. Estimating cost at \$600.00 (American dollars)  
21  
22 each day, ADEs amount to \$198,000 per year, which is a considerable sum for our public  
23  
24 health system. In principle, the events occurred as a result of habitual use of drugs and were  
25  
26 therefore "inevitable"; however, a systematic approach could convert some ADEs from  
27  
28 presumably inevitable to avoidable. A good example cited by Kane-Gill et al<sup>10</sup> describes  
29  
30 bleeding caused by the correct dose of heparin in a patient being monitored by partial  
31  
32 thromboplastin time and would be classified as inevitable. If an investigation identified that  
33  
34 the laboratory has changed their method for thromboplastin time and failed to communicate  
35  
36 the necessary adjustment, the error would become preventable. More studies on  
37  
38 pharmacokinetics and drug interactions in children are required to define optimal dosing  
39  
40 regimens and reduce ADEs.  
41  
42  
43  
44  
45  
46  
47

48 Another limitation of the study was the short time of observation, which did not  
49  
50 include the seasonality of respiratory diseases. A positive aspect of the study was the  
51  
52 analysis of a PICU population in a country outside Europe and North America, therefore  
53  
54 making it possible to analyze ADEs due to drugs such as dipyrene. We hope that our study  
55  
56 will contribute to a future systematic approach to this subject in developing countries.  
57  
58  
59  
60

## CONCLUSIONS

The use of multiple drugs as well as lower patient age favors the occurrence of ADEs, which in turn may result in an increase in the length of PICU hospitalization. The use of an active search using triggers can provide a systematic approach to identify ADEs in PICUs.

## REFERENCES

1. Niederhauser VP. Prescribing for children: issues in pediatric pharmacology. *Nurse Pract* 1997;22(3):16-18.
2. Hussain E, Kao E. Medication safety and transfusion errors in the ICU and beyond. *Crit Care Clin* 2005;21:91-110.
3. Wilson RM, Runciman WB, Gibberd RW, Harrison BT, Newby L, Hamilton JD. The Quality in Australian Health Care Study. *Med J Aust* 1995;163:458-471.
4. Kaushal R, Bates DW, Landrigan C, et al. Medication errors and adverse drug events in pediatric inpatients. *JAMA* 2001;285:2114-2120.
5. Impicciatore P, Choonara I, Clarkson A, Provasi D, Pandolfini C, Bonati M. Incidence of adverse drug reactions in paediatric in/out-patients: a systematic review and meta-analysis of prospective studies. *Br J Clin Pharmacol* 2001;52:77-83.
6. Gill AM, Leach HJ, Hughes J, Barker C, Nunn AJ, Choonara I. Adverse drug reactions in a paediatric intensive care unit. *Acta Paediatr* 1995;84:438-441.

- 1  
2  
3 7. Rozich JD, Haraden CR, Resar RK. Adverse drug event trigger tool: a practical  
4 methodology for measuring medication related harm. *Qual Saf Health Care*  
5 2003;12(3):194–200.  
6  
7
- 8  
9 8. Resar RK, Rozich JD, Classen DC. Methodology and rationale for the measurement  
10 of harm with trigger tools. *Qual Saf Health Care* 2003;12(suppl 2):ii39 –ii45.  
11  
12
- 13 9. Naranjo CA, Busto U, Sellers EM, et al. A method for estimating the probability of  
14 adverse drug reactions. *Clin Pharmacol Ther* 30 (2): 239–245.  
15  
16
- 17 10. Kane-Gill SL, Kirisci L, Verrico MM, Rothschild JM. Analysis of risk factors for  
18 adverse drug events in critically ill patients. *Crit Care Med* 2012;40(3):823-8.  
19  
20
- 21 11. World Health Organization (WHO). Council for International Organizations of  
22 Medical Sciences. Guidelines for preparing core clinical safety information on drug from  
23 CIOMS Working Group III. Geneva; 1995.  
24  
25
- 26 12. Smyth RM, Gargon E, Kirkham J, Cresswell L, Golder S, Smyth R, Williamson P.  
27 Adverse drug reactions in children-a systematic review. *PLoS One*. 2012;7(3):e24061.  
28  
29
- 30 13. Brown SD Jr, Landry FJ. Recognizing, reporting, and reducing adverse drug  
31 reactions. *South Med J* 2001;94(4):370-3.  
32  
33
- 34 14. Kelly WN. How Can I Recognize an Adverse Drug Event. Available online at:  
35 <http://www.medscape.org/viewarticle/569794>. Accessed Feb 1, 2012.  
36  
37
- 38 15. Vargas E, Terleira A, Hernando F, Perez E, Cordon C, Moreno A, Portoles A.  
39 Effect of adverse drug reactions on length of stay in surgical intensive care units. *Crit Care*  
40 *Med* 2003;31(3):694-8.  
41  
42
- 43 16. Holdsworth MT, Fichtl RE, Behta M, et al. Incidence and impact of adverse drug  
44 events in pediatric inpatients. *Arch Pediatr Adolesc Med* 2003;157(1):60–65.  
45  
46  
47  
48  
49  
50  
51  
52  
53  
54  
55  
56  
57  
58  
59  
60

17. Takata GS, Mason W, Taketomo C, Logsdon T, Sharek PJ. Development, testing, and findings of a pediatric-focused trigger tool to identify medication-related harm in US children's hospitals. *Pediatrics* 2008;121(4):e927-3.

Table 1 – rationale for the use of triggers

| Triggers                               | Rationale for use                                                                                                                             |
|----------------------------------------|-----------------------------------------------------------------------------------------------------------------------------------------------|
| Hematological alterations              | Anemia, leukopenia, and thrombocytopenia are adverse reactions of various drugs                                                               |
| Biochemical alterations                | Hyponatremia, hypokalemia, elevated BUN and creatinine are common events with various drugs                                                   |
| Cardiac alterations                    | Tachycardia is common, for example, with beta-adrenergic agents, which can cause other arrhythmias; bradycardia may occur with beta-blockers  |
| Antihistamines                         | Indicator of allergic reaction                                                                                                                |
| Corticoids                             | Potential indicator of allergic reaction                                                                                                      |
| Allergic reactions                     | Frequently reported adverse events                                                                                                            |
| Non-programmed endotracheal intubation | Potential indicator of respiratory depression, common, for example, with benzodiazepines                                                      |
| Level of consciousness degradations    | Common with benzodiazepines, anticonvulsants                                                                                                  |
| Drug interactions                      | For example, hypotension and lethargy caused by concomitant administration of sedatives and anticonvulsants                                   |
| Antiseizures prescription              | Potential indicative of unexpected seizure, when using medications that may lead to changes in electrolytes and seizures, like amphotericin B |
| Drug intolerance                       | For example, vomiting and diarrhea, frequent events with various medications, such as antibiotics                                             |
| Non-programmed suspension of drug      | Indicative of intolerance or adverse reaction                                                                                                 |
| Fever                                  | Adverse event of drugs such as amphotericin B                                                                                                 |
| Sudden death                           | Already reported with drug combinations containing dipyrone                                                                                   |
| Serum level alteration                 | for monitored drugs such as vancomycin and phenobarbital, with a                                                                              |



|                                         |                                                                                                                                      |
|-----------------------------------------|--------------------------------------------------------------------------------------------------------------------------------------|
|                                         | narrow therapeutic range and potentially toxic at high levels                                                                        |
| Aminophylline / adrenaline prescription | Potential indicators of severe allergic reactions                                                                                    |
| Antidotes prescription                  | For example, the use of flumazenil may indicate adverse events due to the use of benzodiazepines                                     |
| Others                                  | Adverse events discovered in the review of medical records, and that does not fit in any trigger, being the trigger the event itself |

*Table 2 – Occurrences of triggers used for active search.*

| <b>Triggers</b>                         | <b>Number of occurrences</b> | <b>Positive predictive value</b> |
|-----------------------------------------|------------------------------|----------------------------------|
| Hematological alterations               | 8                            | 5.79%                            |
| Biochemical alterations                 | 64                           | 46.37%                           |
| Cardiac alterations                     | 17                           | 12.3%                            |
| Antihistamines                          | 5                            | 3.62%                            |
| Corticoids                              | 2                            | 1.45%                            |
| Allergic reactions                      | 11                           | 7.97%                            |
| Non-programmed endotracheal intubation  | 1                            | 0.72%                            |
| Level of consciousness degradations     | 2                            | 1.45%                            |
| Drug interactions                       | 8                            | 5.80%                            |
| Antiseizures prescription               | 2                            | 1.45%                            |
| Drug intolerance                        | 0                            | 0%                               |
| Non-programmed suspension of drug       | 1                            | 0.72%                            |
| Fever                                   | 0                            | 0%                               |
| Sudden death                            | 0                            | 0%                               |
| Serum level alteration                  | 0                            | 0%                               |
| Aminophylline / adrenaline prescription | 0                            | 0%                               |
| Antidotes prescription                  | 3                            | 2.17%                            |
| Others                                  | 14                           | 10.14%                           |

Table 3 – Distribution of prevalent-drug and incident-drug adverse events according to causality.

| ADE      | Prevalent-drug | Incident-drug | TOTAL |
|----------|----------------|---------------|-------|
| Proven   | 0              | 5             | 5     |
| Probable | 12             | 32            | 44    |
| Possible | 27             | 34            | 61    |
| TOTAL    | 39             | 71            | 110   |

Table 4 – Observed adverse drug events (ADEs) and related drugs

| Adverse Drug Events (ADEs)             | N  | Related drugs                                                                                                                                 |
|----------------------------------------|----|-----------------------------------------------------------------------------------------------------------------------------------------------|
| Hyponatremia                           | 27 | furosemide, fentanyl, carbamazepine, vigabatrin, topiramate, hydrochlorothiazide, somatostatin, vancomycin, rifampicin, ranitidine, phenytoin |
| Hyperglycemia                          | 17 | dexamethasone, hydrocortisone, methylprednisolone, terbutaline, tacrolimus                                                                    |
| Hypokalemia                            | 13 | amphotericin b, terbutaline, furosemide, ranitidine                                                                                           |
| Skin rash and urticaria                | 11 | vancomycin, dipyrone, cefepime, ceftriaxone, levetiracetam, dipyrone, rasburicase                                                             |
| Hypoventilation/desaturation of oxygen | 6  | midazolam, propofol, fentanyl, morphine, diazepam                                                                                             |
| Bradycardia                            | 4  | midazolam                                                                                                                                     |
| Hypotension                            | 4  | midazolam, furosemide, thiopental, chlorpromazine                                                                                             |
| Liver enzyme abnormalities             | 4  | meropenem, carbamazepine, amlodipine, carvedilol, clonidine, amitriptyline, phenobarbital                                                     |
| Hypertension                           | 3  | prednisone, tacrolimus, dopamine                                                                                                              |
| Increased BUN and creatinine           | 3  | vancomycin, tacrolimus                                                                                                                        |
| Seizure                                | 2  | hydrocortisone, liposomal amphotericin B, cefepime                                                                                            |
| Tachycardia                            | 2  | terbutaline                                                                                                                                   |
| Anemia                                 | 2  | ketoprofen, paracetamol                                                                                                                       |
| Extrasystole                           | 2  | carvedilol, terbutaline                                                                                                                       |
| Increased number of platelets          | 2  | Meropenem, ceftriaxone                                                                                                                        |
| Vomiting                               | 2  | Nitroprusside, tacrolimus                                                                                                                     |
| Cardiorespiratory arrest               | 1  | dipyrone                                                                                                                                      |
| Thrombocytopenia                       | 1  | dipyrone                                                                                                                                      |
| Apnea                                  | 1  | phenytoin                                                                                                                                     |
| Leukopenia                             | 1  | imipenem                                                                                                                                      |
| Stevens-Johnson syndrome               | 1  | trimethoprim / sulfamethoxazole                                                                                                               |
| Eosinophilia                           | 1  | ceftriaxone                                                                                                                                   |

*Table 5 – Odds ratios related to the concomitant use of medications.*

| Number of drugs | Occurrence of at least one ADE |            |          | Occurrence of more than one ADE |            |          |
|-----------------|--------------------------------|------------|----------|---------------------------------|------------|----------|
|                 | <i>Odds ratio</i>              | 95% CI     | <i>P</i> | <i>Odds ratio</i>               | 95% CI     | <i>P</i> |
| 5               | 2.19                           | 1.14-4.2   | 0.018    | 2.38                            | 0.67-8.38  | 0.175    |
| 6               | 3.0,3                          | 1.69-5.40  | 0.0002   | 3.28                            | 1.06-10.07 | 0.037    |
| 7               | 3.69                           | 2.11-6.46  | < 0.0001 | 2.95                            | 1.14-7.60  | 0.025    |
| 8               | 3.84                           | 2.24-6.80  | < 0.0001 | 3.35                            | 1.34-8.35  | 0.009    |
| 9               | 4.40                           | 2.29-8.45  | < 0.0001 | 3.14                            | 1.24-7.90  | 0.015    |
| 10              | 6.48                           | 2.85-14.77 | < 0.0001 | 3.69                            | 1.36-9.99  | 0.010    |
| 11              | 7.26                           | 2.77-19.01 | < 0.0001 | 5.55                            | 1.98-15.52 | 0.001    |

**TITLE PAGE****ADVERSE DRUG EVENTS IN A PEDIATRIC INTENSIVE CARE UNIT: A PROSPECTIVE COHORT**

Correspondent author: Orlei Ribeiro de Araujo.  
Address: Rua Botucatu 743 CEP 04023062 São Paulo- SP- Brazil  
Phone: +55115080 8400 – e-mail: [orlei@uol.com.br](mailto:orlei@uol.com.br)

**Authors:**

**Dafne C. B. Silva** – MD, Master in Pediatrics, Instituto da Criança, Faculty of Medicine, University of Sao Paulo, FMUSP, Brazil. [dafnechs@gmail.com](mailto:dafnechs@gmail.com)

**Orlei R. Araujo** - MD, Master in Pediatrics, Pediatric Oncology Institute (GRAACC/IOP), Federal University of Sao Paulo, Brazil. [orlei@uol.com.br](mailto:orlei@uol.com.br)

**Rodrigo G. Arduini** - MD, Pediatric Oncology Institute (GRAACC/IOP), Federal University of Sao Paulo, Brazil. [rodrigogenaro@gmail.com](mailto:rodrigogenaro@gmail.com)

**Carolina F. R. Alonso** - MD, Pediatric Oncology Institute (GRAACC/IOP), Federal University of Sao Paulo, Brazil. [carolinaalonso13@gmail.com](mailto:carolinaalonso13@gmail.com)

**Audrey R. O. Shibata** – MD, Instituto da Criança, Faculty of Medicine, University of Sao Paulo, FMUSP, Brazil. [audrey.shibata@gmail.com](mailto:audrey.shibata@gmail.com).

**Eduardo J. Troster.** PhD, Instituto da Criança, Faculty of Medicine, University of Sao Paulo, FMUSP, Brazil. [troster@einstein.br](mailto:troster@einstein.br)

**Institution:**

Instituto da Criança - Faculty of Medicine, University of Sao Paulo, FMUSP, Brazil.  
Adress: Av. Dr. Eneas Carvalho de Aguiar, 647, São Paulo - SP - Brasil CEP - 05403.000 –  
Phone: +5511 2661- 8500  
Home page: <http://icr.usp.br/>

**Key Words:** drug toxicity; pharmacovigilance; drug monitoring; intensive care; pediatrics; patient safety.

## ABSTRACT

**Objectives:** To describe adverse drug events (ADEs) in children under intensive care, identify risk factors and tools that can detect ADEs early, and the impact on length of stay (LOS).

**Design:** Prospective, observational study.

**Setting:** Pediatric intensive care unit of a tertiary care teaching hospital.

**Patients:** 239 patients with a mean age of 67.5 months representing 1818 days of hospitalization in intensive care unit .

**Interventions:** Active search of charts and electronic patient records using triggers. The statistical analysis involved linear and logistic regression.

**Measurements and Main Results:** The average LOS was 7.6 days. There were 110 proven, probable, and possible ADEs in 84 patients (35.1%). We observed 138 instances of triggers. The major classes of drugs associated with events were: antibiotics (n = 41), diuretics (n = 24), antiseizures (n = 23), sedatives and analgesics (n = 17), and steroids (n = 18). The number of drugs administered was most related to the occurrence of ADEs and also to the length of stay ( $p < 0.001$ ). The occurrence of an ADE may result in an increase in the length of stay by 1.5 days per event, but this was not statistically significant in this sample. Patient aged less than 48 months also proved to be at significant risk for ADEs, with an odds ratio of 1.84 (confidence interval - 95% CI - 1.07 to 3.15,  $p = 0.025$ ). The number of drugs administered also correlated with the number of ADEs ( $p < 0.0001$ ). The chance of having at least one ADE increased linearly as the patient was administered more drugs.

1  
2  
3 **Conclusions:** The use of multiple drugs as well as lower patient age favors the occurrence  
4 of ADEs. The active search described here provides a systematic approach to this problem.  
5  
6  
7  
8  
9

## 10 INTRODUCTION

11  
12 The use of medication in children and infants is a matter of great concern largely  
13 due to the vulnerability of their constantly changing and developing homeostasis, as well as  
14 the unique mechanisms by which different children respond to injuries. There are important  
15 differences in absorption, distribution, metabolism and excretion of drugs during childhood  
16 and early adolescence.<sup>1</sup> In addition, several medications have not exhibited safety in the  
17 pediatric age group, while others are prescribed differently than recommended for adults;  
18 key differences include dose and frequency of administration, presentation of the drug,  
19 route of administration, or indication for use in childhood (i.e. "off-label" use), and each of  
20 these factors can vary depending on the age of the child.<sup>2</sup> Most of times, recommended  
21 doses of drugs used in children are based on extrapolations from adult doses, related only to  
22 weight, body surface area, and age, often ignoring their pharmacokinetic and  
23 pharmacodynamic properties; this results in increased susceptibility of children to drug-  
24 related adverse events.<sup>1-4</sup>  
25  
26  
27  
28  
29  
30  
31  
32  
33  
34  
35  
36  
37  
38  
39  
40  
41  
42

43 Reports documenting the incidence of adverse drug events in the pediatric  
44 population range from 4.3% to 16.7%; 12.2% of these events being serious in nature, with  
45 high morbidity and mortality.<sup>5</sup> Hospitalized children may be at a higher risk of an adverse  
46 event, as doses, drug safety, and effectiveness are often difficult to determine.<sup>6</sup> Kaushal  
47 and colleagues identified that the potential frequency of ADEs in children is three times  
48 higher than a previous study focused on ADEs in adults, however, the rate of avoidable  
49 ADEs was similar.<sup>4</sup> In intensive care units, multiple, potentially hazardous drugs are  
50  
51  
52  
53  
54  
55  
56  
57  
58  
59  
60

1  
2  
3 routinely administered, such as inotropes, sedation medications, analgesia, and antibiotics;  
4  
5 as the risk of an ADE increases by 1.7% for each additional drug used,<sup>5</sup> it is far more likely  
6  
7 that adverse reactions will occur in the ICU.  
8  
9

10 There are few studies documenting safety in drug administration in children in the  
11 ICU. The primary objective of this study was to describe ADEs in children admitted to the  
12 pediatric ICU (PICU) of a tertiary care hospital in Sao Paulo, Brazil. As secondary  
13  
14 objectives, we attempted to identify risk factors for such events and tools that could detect  
15  
16 them early as well as determine if there was impact on LOS.  
17  
18  
19  
20  
21  
22  
23

## 24 MATERIALS AND METHODS

25  
26 We conducted a preliminary survey over a period of 22 days in March 2004 to  
27 identify the number of admissions required to effectively report ADEs in the PICU, a unit  
28 of 13 beds, with average occupation of 80%. Based on the results of this survey, we  
29 determined that it would then be necessary to study 150 admissions to reach a stable  
30 estimate of the incidence of ADEs and explore possible risk factors using a multivariate  
31 analysis (approximately 10 ADEs for each variable potentially associated). The study  
32 population consisted of consecutive admissions to the PICU between October 1, 2005 and  
33 March 31, 2006. The strategy to identify ADEs was through an active search, using pre-  
34 established parameters ("triggers"). A "trigger" can be defined as an occurrence, prompt, or  
35 flag, found when reviewing a patient's medical chart, that requires further investigation to  
36 determine the presence or absence of an adverse event.<sup>7,8</sup> Using this method, specific  
37  
38 events, such as prescription or abrupt discontinuation of certain medications, prescription of  
39  
40 antidotes, and some laboratory tests, serve as indicators for further investigation. Several  
41  
42 triggers have been described in the literature,<sup>8</sup> and therefore we chose and adapted the ones  
43  
44  
45  
46  
47  
48  
49  
50  
51  
52  
53  
54  
55  
56  
57  
58  
59  
60

1  
2  
3 that seemed more consistent with the drugs commonly used in our PICU. Table 1 shows  
4  
5 these triggers and the rationale for their use. The positive predictive value (PPV) of each  
6  
7 trigger was calculated as the number of times that each trigger identified an ADE, divided  
8  
9 by the total number of times the triggers were identified in the active search.  
10  
11

12 The following methodology was undertaken for active search:

13  
14 1. The admission form for each new patient in the PICU was entered by two trained  
15  
16 intensive care pediatricians; data were reviewed by 2 authors (Drs. Silva and Shibata) and  
17  
18 consolidated in agreement.  
19  
20

21  
22 2. The following records for each patient were reviewed, guided by triggers indicative of  
23  
24 adverse events:

- 25 - Laboratory tests (electronic database);
- 26
- 27 - Clinical annotations;
- 28
- 29 - Nursing annotations;
- 30
- 31 - Prescription;
- 32
- 33
- 34
- 35

36 3. The Naranjo algorithm was applied to classify the cause of the ADE: proven, probable,  
37  
38 possible, or doubtful;<sup>9</sup>

39  
40 4. Analysis of all proven, probable and possible ADEs.  
41  
42

43 The study included only unavoidable ADEs, that is, only those that occurred during  
44  
45 normal use of a drug, and not the result of a human error,<sup>10</sup> as well as those classified as  
46  
47 moderate to severe according to the World Health Organization (WHO) guidelines: By this  
48  
49 definition (WHO), ADE is any detrimental or undesirable event, unintended, which appears  
50  
51 after administration of a drug at doses normally used for prophylaxis, diagnosis or  
52  
53 treatment of a disease. A moderate reaction is one that requires modification of therapy and  
54  
55 may require specific treatment; a severe reaction is potentially fatal and requires specific  
56  
57  
58  
59  
60



1  
2  
3 treatment, requires or prolongs hospitalization.<sup>11</sup> We analyzed only those ADEs that  
4  
5 appeared after admission. ADEs that appeared after admission but were related to drugs  
6  
7 that the patient was receiving before being admitted were defined as due to “prevalent  
8  
9 drug”. This definition eliminated, for example, ADEs due to chemotherapy already present  
10  
11 before admission in patients with cancer. ADEs related to drugs introduced after admission  
12  
13 were classified as due to “incident drug”. The study protocol was reviewed and approved  
14  
15 by the Ethics Committee of the institution prior to the start of data collection (protocol  
16  
17 number 485/56/2005). Because of the observational nature of the study, without any  
18  
19 interference in therapy, informed consent was waived.  
20  
21  
22  
23

24  
25 Statistical analysis was performed using SPSS and Microsoft Excel, obtaining the  
26  
27 odds ratios (OR) by logistic regression. A multinomial logistic regression model was  
28  
29 performed with the variables “Presence of chronic disease”, “Age”, “Gender”, “Number of  
30  
31 drugs” (independent) and “ADEs” (dependent). We chose the variables “Age” and “number  
32  
33 of drugs” because they have been significantly correlated with the incidence of ADEs.<sup>5</sup>  
34  
35 Some studies have shown a lower risk for ADEs in male children.<sup>12</sup> Chronic illness is an  
36  
37 important variable due to the continuous use of various drugs and the presence of organ  
38  
39 dysfunction. We used also a linear regression model for the variables “ADEs”, “Presence of  
40  
41 chronic disease”, “Age”, “Gender”, “Number of drugs” (independent), and “LOS”  
42  
43 (dependent). Significance of differences between means was obtained with the T test.  
44  
45 Variables involving time were analyzed using the Kaplan-Meier method, and  $p < 0.05$  was  
46  
47 considered statistically significant.  
48  
49  
50  
51  
52  
53  
54

## 55 RESULTS

56  
57  
58  
59  
60

1  
2  
3 In our pilot survey, we identified 20 adverse events of moderate to severe intensity  
4 over a period of 22 days in March 2004, which we calculated to represent at least 5 events  
5 per 100 patient-days.  
6  
7  
8

9  
10 In our actual study, there were 244 admissions to the PICU during the period  
11 between October 1, 2005 and March 31, 2006. Four patients were excluded because they  
12 were adult living-donors for liver transplant, and one patient was excluded due to age > 18  
13 years. We analyzed the remaining 239 patients, representing a total of 1818 days of PICU  
14 hospitalization. The average length of stay was 7.6 days with a standard deviation (SD) of  
15 9.5 days.  
16  
17  
18  
19

20 The mean age was 67.5 months (median 51 months, range 1-243), and 113 patients  
21 (47.2%) were younger than 48 months. Ninety-four of the 239 patients were male (39.3%).  
22 Only 39 of the 239 patients did not have a chronic disease at admission (16.3%); the most  
23 prevalent chronic diseases were cancer (n = 48, 20%), hepatic disease (n = 37, 15.4%),  
24 neurological disease (n = 28, 11.7%), respiratory disease (n = 28, 11.7 %), and cardiac  
25 disease (n = 12, 5%). Admissions were mostly due to respiratory failure (n = 83),  
26 postoperative of neurosurgical, general, or cardiac surgery (n = 52), decreased level of  
27 consciousness (n = 14), or sepsis/septic shock (n = 28). Other causes were seizures,  
28 digestive bleeding, dehydration, renal failure, hypertension, and others.  
29  
30  
31  
32  
33  
34  
35  
36  
37  
38  
39  
40  
41  
42  
43  
44

45 We observed 138 occurrences of triggers, as shown in Table 2, with their predictive  
46 positive values. These triggers led to the identification of 110 proven, probable, or possible  
47 ADEs in 84 patients (35.1%) during the six month study period, resulting in a rate of 60.5  
48 ADEs / 1,000 patient-days; 21 patients had more than one ADE. Thirty-nine ADEs were  
49 due to prevalent drugs and the remaining 71 (64.5%) were related to drugs introduced after  
50  
51  
52  
53  
54  
55  
56  
57  
58  
59  
60

PICU admission or “incidents” (Table 3). Table 4 shows the observed ADEs and related drugs.

Gender, the presence of chronic disease, age, and administration of at least five drugs were included in a multinomial logistic regression analysis as independent variables for the incidence of ADEs (dependent variable); for males, the odds ratio (OR) was 1.31 ( $p = 0.33$ ); for the presence of a chronic disease, the OR was 0.71 ( $p = 0.35$ ), and none of the individual chronic conditions displayed an increased risk for ADEs; however, patient age less than 48 months proved to be a significant risk factor, with an OR of 2.1 (95% CI: 1.19 - 3.72,  $p = 0.01$ ). There was a positive interaction in patients aged less than 48 months and concomitant administration of at least five drugs (OR = 2.05, 95% CI: 1.18-3.57,  $p = 0.01$ ) in the occurrence of at least one ADE. This interaction remained significant, with discrete elevation of the OR until 9 concomitant drugs were administered (OR = 2.03, 95% CI: 1.15-3.60,  $p = 0.014$ , for age < 48 months; and OR = 4.69, 95% CI: 2.41-9.15,  $p < 0.0001$  for the use of 9 drugs).

In a bivariate analysis, the number of drugs received by each patient correlated with the number of ADEs ( $R^2 = 0.13$ ,  $p < 0.0001$ ). The likelihood of at least one ADE became significant when the patient was given at least 5 drugs at the same time (OR 2.19 – 95% CI: 1.14 – 4.20,  $p = 0.018$ ). We observed a linear elevation of the chance of an occurrence of an ADE as the patient was administered more medications, achieving an OR of 7.26 (95% CI: 2.77 - 19.1,  $p < 0.0001$ ) with 11 concomitant drugs. The same was observed for the occurrence of more than one ADE (Table 5).

There was a significant difference between the mean LOS between patients with and without ADEs (11.1 vs. 5.3 days,  $p < 0.0001$ ). In a bivariate linear regression model (LOS as the dependent variable and ADEs as independent), the slope coefficient was 2.75

1  
2  
3 (p = 0.001), meaning that each ADE corresponded to an increase of 2.75 days in the LOS.  
4  
5 However, this increase was not maintained when other confounding variables were added  
6  
7 in the multivariate regression model. The only independent variables remaining in the final  
8  
9 model that affected LOS were the number of ADEs (p = 0.089; slope coefficient 1.49) and  
10  
11 the number of drugs (p < 0.001; slope coefficient 0.83; R<sup>2</sup> = 0.104); The slope coefficient  
12  
13 could indicate an increase in LOS of 1.49 days for each ADE, if statistically significant, but  
14  
15 the study did not have the power to demonstrate it. A sample calculation showed that in  
16  
17 order for this fact to be significant in a larger sample, it would take 1000 patients to achieve  
18  
19 p < 0.05 with a power of 0.94, considering the observed standard deviation of 9.5 for the  
20  
21 dependent variable “LOS” and 0.72 for independent “number of ADEs”. Other variables  
22  
23 did not show any significant relationship.  
24  
25  
26  
27  
28

29 In addition, mean “survival” without ADEs (time from admittance to the PICU until  
30  
31 the occurrence of an ADE) was 19 days for patients older than 48 months and 11.2 days for  
32  
33 patients younger than 48 months (p = 0.017).  
34  
35

36 The drug classes involved in ADEs were: antibiotics (n = 41), diuretics (24),  
37  
38 antiseizures (23), sedatives and analgesics (17), steroids (18), antihypertensives (9),  
39  
40 bronchodilators (8), gastric protectors (3), immunosuppressives (4), vasoactive drugs (5),  
41  
42 hormonal analogues (4), antipyretics (4), and others (5).  
43  
44  
45  
46  
47

## 48 DISCUSSION

49  
50 Determining the occurrence of adverse events in an intensive care environment is a  
51  
52 complex task. The symptoms of the event may overlap the underlying disease and may be  
53  
54 caused by several unrelated factors including the pharmacokinetic profile of the drug,  
55  
56 unknown drug allergies of each patient, or human error. These difficulties may serve as an  
57  
58  
59  
60

1  
2  
3 explanation for why many events are not recognized as ADEs. Frequently, other drugs are  
4 administered in an attempt to solve the problem created by the ADE, without the specific  
5 diagnosis. While some events are easily attributed to certain drugs, there are several  
6 possible and poorly documented events and some are completely unknown and rare. There  
7 are also a multitude of patient-specific risk-factors leading to the occurrence of an ADE,  
8 including age and certain comorbidities, such as the presence of renal or hepatic  
9 impairment. Drug-related factors such as toxicity, time of administration, dosage, and  
10 duration of use are variables that can also impact the probability of ADEs. In addition, new  
11 drugs that have just completed phase III clinical trials may not have been powered to detect  
12 rare events.<sup>13</sup> In general, if we don't look for ADEs, it is unlikely that we will find them.<sup>14</sup>  
13  
14  
15  
16  
17  
18  
19  
20  
21  
22  
23  
24  
25  
26

27 In the absence of reliable empirical methods for detection of ADEs, formal and  
28 logical tools can help differentiate an ADE from a symptom caused by exacerbations in a  
29 patient's underlying condition. The most widely accepted formal instrument to obtain this  
30 is the Naranjo algorithm; however, this tool is also not without bias: in our sample, only 5  
31 of 110 ADEs were classified as "proven" or definite (scores 9 and 10). Therefore, some  
32 included events may not have been ADEs. However, to prove an ADE according to the  
33 algorithm, it is necessary to re-administer the drug and observe the event again, or obtain  
34 serum levels that are known to be toxic. The first option is strongly discouraged and the  
35 second may be technically impossible or unavailable. However, we excluded the "doubtful"  
36 events (score equal to or less than 1) from our analysis and some of these events may have  
37 actually been ADEs.  
38  
39  
40  
41  
42  
43  
44  
45  
46  
47  
48  
49  
50  
51

52  
53 Most of our patients had chronic diseases, which may contribute to a higher  
54 incidence of ADEs, due to the use of multiple medications. This population of chronic  
55 patients reflects the current reality of Brazilian university hospitals. We observed no  
56  
57  
58  
59  
60

1  
2  
3 significant difference in ADE incidence between patients with and without chronic  
4  
5 diseases, which can be explained by the exclusion of events prior to PICU admission and  
6  
7  
8 was more likely related to the medications used regularly.  
9

10 The incidence of observed events (35.1% of admissions) is much higher than those  
11 reported in adult patients hospitalized in ICUs (around 9%).<sup>15</sup> Furthermore, we found that  
12 younger children under the age of 48 months, which constitute approximately half the  
13 patient sample, were more likely to have ADEs. This was particularly significant with the  
14 administration of over five drugs at the same time, and also resulted in an ADE earlier in  
15 the patient's ICU stay. The high incidence of ADEs also highlights the importance of an  
16 active search focused on triggers to detect ADEs in children: Holdsworth et al reported  
17 ADE rates of 6 per 100 admissions (ICU and pediatric ward, determined using a chart  
18 review by a pharmacist).<sup>16</sup> Takata et al. performed a search focused on triggers and reported  
19 11.1 events/100 inpatients, almost double that of the retrospective study. These authors  
20 indicated that performing a search focused on specific circumstances associated with ADEs  
21 in specific elements of the patient's chart can increase the rates of observed ADEs.<sup>17</sup> The  
22 methodology we used in this study (definition of triggers and daily search in the records of  
23 patients) is a simple way to perform an active search for ADEs. Triggers can be  
24 individualized for each hospital setting according to the most frequently used medications.  
25 PPVs can be determined through a simple calculation that assists in the choice of triggers  
26 that are most useful in each unit. We observed higher PPVs for biochemical alterations; in  
27 an automated process, the system of the laboratory itself could alert for possible ADEs.  
28  
29  
30  
31  
32  
33  
34  
35  
36  
37  
38  
39  
40  
41  
42  
43  
44  
45  
46  
47  
48  
49  
50  
51  
52

53 We wish to highlight that our study evaluated severely ill children under intensive  
54 care receiving multiple drugs (up to 18), and the chances of developing an ADE is  
55 therefore, more likely. In addition, comparing event rates is also challenging and potentially  
56  
57  
58  
59  
60

1  
2  
3 misleading as definitions of ADEs are unclear among studies, ranging from a benign and  
4  
5 transient alteration of electrolytes to vital organ damage.<sup>10</sup>  
6  
7

8 We investigated whether ADEs may have an impact on the LOS in the PICU. **The**  
9  
10 **most important limitation of the study was** that our sample did not have the power to  
11  
12 implicate ADEs as a causative factor in prolonging PICU stays by 1.5 days; however,  
13  
14 calculations based on standard deviations observed in our sample showed a high probability  
15  
16 that this would be true in a longer-term study. In addition to **possible** patient harm, there are  
17  
18 significant costs associated with patient stays in the ICU: An increase of 1.5 days per event  
19  
20 results in an additional 330 days per year. Estimating cost at \$600.00 (American dollars)  
21  
22 each day, ADEs amount to \$198,000 per year, which is a considerable sum for our public  
23  
24 health system. In principle, the events occurred as a result of habitual use of drugs and were  
25  
26 therefore "inevitable"; however, a systematic approach could convert some ADEs from  
27  
28 **presumably** inevitable to avoidable. A good example cited by Kane-Gill et al<sup>10</sup> describes  
29  
30 bleeding caused by the correct dose of heparin in a patient being monitored by partial  
31  
32 thromboplastin time and would be classified as inevitable. If an investigation identified that  
33  
34 the laboratory has changed their method for thromboplastin time and failed to communicate  
35  
36 the necessary adjustment, the error would become preventable. More studies on  
37  
38 pharmacokinetics and drug interactions in children are required to define optimal dosing  
39  
40 regimens and reduce ADEs.  
41  
42  
43  
44  
45  
46  
47

48 **Another limitation of the study was the short time of observation, which did not**  
49  
50 **include the seasonality of respiratory diseases. A positive aspect of the study was the**  
51  
52 **analysis of a PICU population in a country outside Europe and North America, therefore**  
53  
54 **making it possible to analyze ADEs due to drugs such as dipyron. We hope that our study**  
55  
56 **will contribute to a future systematic approach to this subject in developing countries.**  
57  
58  
59  
60

## CONCLUSIONS

The use of multiple drugs as well as lower patient age favors the occurrence of ADEs, which in turn may result in an increase in the length of PICU hospitalization. The use of an active search using triggers can provide a systematic approach to identify ADEs in PICUs.

## REFERENCES

1. Niederhauser VP. Prescribing for children: issues in pediatric pharmacology. *Nurse Pract* 1997;22(3):16-18.
2. Hussain E, Kao E. Medication safety and transfusion errors in the ICU and beyond. *Crit Care Clin* 2005;21:91-110.
3. Wilson RM, Runciman WB, Gibberd RW, Harrison BT, Newby L, Hamilton JD. The Quality in Australian Health Care Study. *Med J Aust* 1995;163:458-471.
4. Kaushal R, Bates DW, Landrigan C, et al. Medication errors and adverse drug events in pediatric inpatients. *JAMA* 2001;285:2114-2120.
5. Impicciatore P, Choonara I, Clarkson A, Provasi D, Pandolfini C, Bonati M. Incidence of adverse drug reactions in paediatric in/out-patients: a systematic review and meta-analysis of prospective studies. *Br J Clin Pharmacol* 2001;52:77-83.
6. Gill AM, Leach HJ, Hughes J, Barker C, Nunn AJ, Choonara I. Adverse drug reactions in a paediatric intensive care unit. *Acta Paediatr* 1995;84:438-441.



- 1  
2  
3 7. Rozich JD, Haraden CR, Resar RK. Adverse drug event trigger tool: a practical  
4 methodology for measuring medication related harm. *Qual Saf Health Care*  
5 2003;12(3):194–200.  
6  
7
- 8  
9 8. Resar RK, Rozich JD, Classen DC. Methodology and rationale for the measurement  
10 of harm with trigger tools. *Qual Saf Health Care* 2003;12(suppl 2):ii39 –ii45.  
11  
12
- 13 9. Naranjo CA, Busto U, Sellers EM, et al. A method for estimating the probability of  
14 adverse drug reactions. *Clin Pharmacol Ther* 30 (2): 239–245.  
15  
16
- 17 10. Kane-Gill SL, Kirisci L, Verrico MM, Rothschild JM. Analysis of risk factors for  
18 adverse drug events in critically ill patients. *Crit Care Med* 2012;40(3):823-8.  
19  
20
- 21 11. World Health Organization (WHO). Council for International Organizations of  
22 Medical Sciences. Guidelines for preparing core clinical safety information on drug from  
23 CIOMS Working Group III. Geneva; 1995.  
24  
25
- 26 12. Smyth RM, Gargon E, Kirkham J, Cresswell L, Golder S, Smyth R, Williamson P.  
27 Adverse drug reactions in children-a systematic review. *PLoS One*. 2012;7(3):e24061.  
28  
29
- 30 13. Brown SD Jr, Landry FJ. Recognizing, reporting, and reducing adverse drug  
31 reactions. *South Med J* 2001;94(4):370-3.  
32  
33
- 34 14. Kelly WN. How Can I Recognize an Adverse Drug Event. Available online at:  
35 <http://www.medscape.org/viewarticle/569794>. Accessed Feb 1, 2012.  
36  
37
- 38 15. Vargas E, Terleira A, Hernando F, Perez E, Cordon C, Moreno A, Portoles A.  
39 Effect of adverse drug reactions on length of stay in surgical intensive care units. *Crit Care*  
40 *Med* 2003;31(3):694-8.  
41  
42
- 43 16. Holdsworth MT, Fichtl RE, Behta M, et al. Incidence and impact of adverse drug  
44 events in pediatric inpatients. *Arch Pediatr Adolesc Med* 2003;157(1):60–65.  
45  
46  
47  
48  
49  
50  
51  
52  
53  
54  
55  
56  
57  
58  
59  
60

17. Takata GS, Mason W, Taketomo C, Logsdon T, Sharek PJ. Development, testing, and findings of a pediatric-focused trigger tool to identify medication-related harm in US children's hospitals. *Pediatrics* 2008;121(4):e927-3.

Table 1 – rationale for the use of triggers

| Triggers                               | Rationale for use                                                                                                                             |
|----------------------------------------|-----------------------------------------------------------------------------------------------------------------------------------------------|
| Hematological alterations              | Anemia, leukopenia, and thrombocytopenia are adverse reactions of various drugs                                                               |
| Biochemical alterations                | Hyponatremia, hypokalemia, elevated BUN and creatinine are common events with various drugs                                                   |
| Cardiac alterations                    | Tachycardia is common, for example, with beta-adrenergic agents, which can cause other arrhythmias; bradycardia may occur with beta-blockers  |
| Antihistamines                         | Indicator of allergic reaction                                                                                                                |
| Corticoids                             | Potential indicator of allergic reaction                                                                                                      |
| Allergic reactions                     | Frequently reported adverse events                                                                                                            |
| Non-programmed endotracheal intubation | Potential indicator of respiratory depression, common, for example, with benzodiazepines                                                      |
| Level of consciousness degradations    | Common with benzodiazepines, anticonvulsants                                                                                                  |
| Drug interactions                      | For example, hypotension and lethargy caused by concomitant administration of sedatives and anticonvulsants                                   |
| Antiseizures prescription              | Potential indicative of unexpected seizure, when using medications that may lead to changes in electrolytes and seizures, like amphotericin B |
| Drug intolerance                       | For example, vomiting and diarrhea, frequent events with various medications, such as antibiotics                                             |
| Non-programmed suspension of drug      | Indicative of intolerance or adverse reaction                                                                                                 |
| Fever                                  | Adverse event of drugs such as amphotericin B                                                                                                 |
| Sudden death                           | Already reported with drug combinations containing dipyrone                                                                                   |
| Serum level alteration                 | for monitored drugs such as vancomycin and phenobarbital, with a                                                                              |

|                                         |                                                                                                                                      |
|-----------------------------------------|--------------------------------------------------------------------------------------------------------------------------------------|
|                                         | narrow therapeutic range and potentially toxic at high levels                                                                        |
| Aminophylline / adrenaline prescription | Potential indicators of severe allergic reactions                                                                                    |
| Antidotes prescription                  | For example, the use of flumazenil may indicate adverse events due to the use of benzodiazepines                                     |
| Others                                  | Adverse events discovered in the review of medical records, and that does not fit in any trigger, being the trigger the event itself |

*Table 2 – Occurrences of triggers used for active search.*

| <b>Triggers</b>                         | <b>Number of occurrences</b> | <b>Positive predictive value</b> |
|-----------------------------------------|------------------------------|----------------------------------|
| Hematological alterations               | 8                            | 5.79%                            |
| Biochemical alterations                 | 64                           | 46.37%                           |
| Cardiac alterations                     | 17                           | 12.3%                            |
| Antihistamines                          | 5                            | 3.62%                            |
| Corticoids                              | 2                            | 1.45%                            |
| Allergic reactions                      | 11                           | 7.97%                            |
| Non-programmed endotracheal intubation  | 1                            | 0.72%                            |
| Level of consciousness degradations     | 2                            | 1.45%                            |
| Drug interactions                       | 8                            | 5.80%                            |
| Antiseizures prescription               | 2                            | 1.45%                            |
| Drug intolerance                        | 0                            | 0%                               |
| Non-programmed suspension of drug       | 1                            | 0.72%                            |
| Fever                                   | 0                            | 0%                               |
| Sudden death                            | 0                            | 0%                               |
| Serum level alteration                  | 0                            | 0%                               |
| Aminophylline / adrenaline prescription | 0                            | 0%                               |
| Antidotes prescription                  | 3                            | 2.17%                            |
| Others                                  | 14                           | 10.14%                           |

Table 3 – Distribution of prevalent-drug and incident-drug adverse events according to causality.

| ADE      | Prevalent-drug | Incident-drug | TOTAL |
|----------|----------------|---------------|-------|
| Proven   | 0              | 5             | 5     |
| Probable | 12             | 32            | 44    |
| Possible | 27             | 34            | 61    |
| TOTAL    | 39             | 71            | 110   |

Table 4 – Observed adverse drug events (ADEs) and related drugs

| Adverse Drug Events (ADEs)             | N  | Related drugs                                                                                                                                 |
|----------------------------------------|----|-----------------------------------------------------------------------------------------------------------------------------------------------|
| Hyponatremia                           | 27 | furosemide, fentanyl, carbamazepine, vigabatrin, topiramate, hydrochlorothiazide, somatostatin, vancomycin, rifampicin, ranitidine, phenytoin |
| Hyperglycemia                          | 17 | dexamethasone, hydrocortisone, methylprednisolone, terbutaline, tacrolimus                                                                    |
| Hypokalemia                            | 13 | amphotericin b, terbutaline, furosemide, ranitidine                                                                                           |
| Skin rash and urticaria                | 11 | vancomycin, dipyron, cefepime, ceftriaxone, levetiracetam, dipyron, rasburicase                                                               |
| Hypoventilation/desaturation of oxygen | 6  | midazolam, propofol, fentanyl, morphine, diazepam                                                                                             |
| Bradycardia                            | 4  | midazolam                                                                                                                                     |
| Hypotension                            | 4  | midazolam, furosemide, thiopental, chlorpromazine                                                                                             |
| Liver enzyme abnormalities             | 4  | meropenem, carbamazepine, amlodipine, carvedilol, clonidine, amitriptyline, phenobarbital                                                     |
| Hypertension                           | 3  | prednisone, tacrolimus, dopamine                                                                                                              |
| Increased BUN and creatinine           | 3  | vancomycin, tacrolimus                                                                                                                        |
| Seizure                                | 2  | hydrocortisone, liposomal amphotericin B, cefepime                                                                                            |
| Tachycardia                            | 2  | terbutaline                                                                                                                                   |
| Anemia                                 | 2  | ketoprofen, paracetamol                                                                                                                       |
| Extrasystole                           | 2  | carvedilol, terbutaline                                                                                                                       |
| Increased number of platelets          | 2  | Meropenem, ceftriaxone                                                                                                                        |
| Vomiting                               | 2  | Nitroprusside, tacrolimus                                                                                                                     |
| Cardiorespiratory arrest               | 1  | dipyron                                                                                                                                       |
| Thrombocytopenia                       | 1  | dipyron                                                                                                                                       |
| Apnea                                  | 1  | phenytoin                                                                                                                                     |
| Leukopenia                             | 1  | imipenem                                                                                                                                      |
| Stevens-Johnson syndrome               | 1  | trimethoprim / sulfamethoxazole                                                                                                               |
| Eosinophilia                           | 1  | ceftriaxone                                                                                                                                   |

*Table 5 – Odds ratios related to the concomitant use of medications.*

| Number of drugs | Occurrence of at least one ADE |            |          | Occurrence of more than one ADE |            |          |
|-----------------|--------------------------------|------------|----------|---------------------------------|------------|----------|
|                 | <i>Odds ratio</i>              | 95% CI     | <i>P</i> | <i>Odds ratio</i>               | 95% CI     | <i>P</i> |
| 5               | 2.19                           | 1.14-4.2   | 0.018    | 2.38                            | 0.67-8.38  | 0.175    |
| 6               | 3.0,3                          | 1.69-5.40  | 0.0002   | 3.28                            | 1.06-10.07 | 0.037    |
| 7               | 3.69                           | 2.11-6.46  | < 0.0001 | 2.95                            | 1.14-7.60  | 0.025    |
| 8               | 3.84                           | 2.24-6.80  | < 0.0001 | 3.35                            | 1.34-8.35  | 0.009    |
| 9               | 4.40                           | 2.29-8.45  | < 0.0001 | 3.14                            | 1.24-7.90  | 0.015    |
| 10              | 6.48                           | 2.85-14.77 | < 0.0001 | 3.69                            | 1.36-9.99  | 0.010    |
| 11              | 7.26                           | 2.77-19.01 | < 0.0001 | 5.55                            | 1.98-15.52 | 0.001    |



**ADVERSE DRUG EVENTS IN A PEDIATRIC INTENSIVE CARE  
UNIT: A PROSPECTIVE COHORT**

|                                 |                                                                                                                                                                                                                                                                                                                                                                                                                                                                                                                                                               |
|---------------------------------|---------------------------------------------------------------------------------------------------------------------------------------------------------------------------------------------------------------------------------------------------------------------------------------------------------------------------------------------------------------------------------------------------------------------------------------------------------------------------------------------------------------------------------------------------------------|
| Journal:                        | <i>BMJ Open</i>                                                                                                                                                                                                                                                                                                                                                                                                                                                                                                                                               |
| Manuscript ID:                  | bmjopen-2012-001868.R2                                                                                                                                                                                                                                                                                                                                                                                                                                                                                                                                        |
| Article Type:                   | Research                                                                                                                                                                                                                                                                                                                                                                                                                                                                                                                                                      |
| Date Submitted by the Author:   | 23-Jan-2013                                                                                                                                                                                                                                                                                                                                                                                                                                                                                                                                                   |
| Complete List of Authors:       | Silva, Dafne; Faculty of Medicine, University of Sao Paulo, FMUSP, Instituto da Criança<br>Araujo, Orlei; Instituto de Oncologia Pediatrica, Intensive Care Unit<br>Arduini, Rodrigo; Instituto de Oncologia Pediatrica (GRAAC/IOP/UNIFESP), Intensive Care Unit<br>Alonso, Carolina; Instituto de Oncologia Pediatrica (GRAAC/IOP/UNIFESP), Intensive Care Unit<br>Shibata, Audrey; Faculty of Medicine, University of Sao Paulo, FMUSP, Instituto da Criança<br>Troster, Eduardo; Faculty of Medicine, University of Sao Paulo, FMUSP, Instituto da Criança |
| <b>Primary Subject Heading</b>: | Intensive care                                                                                                                                                                                                                                                                                                                                                                                                                                                                                                                                                |
| Secondary Subject Heading:      | Paediatrics, Pharmacology and therapeutics                                                                                                                                                                                                                                                                                                                                                                                                                                                                                                                    |
| Keywords:                       | Paediatric intensive & critical care < ANAESTHETICS, Adverse events < THERAPEUTICS, Toxicity < THERAPEUTICS                                                                                                                                                                                                                                                                                                                                                                                                                                                   |
|                                 |                                                                                                                                                                                                                                                                                                                                                                                                                                                                                                                                                               |

SCHOLARONE™  
Manuscripts

only

**TITLE PAGE****ADVERSE DRUG EVENTS IN A PEDIATRIC INTENSIVE CARE UNIT: A PROSPECTIVE COHORT**

Correspondent author: Orlei Ribeiro de Araujo.  
Address: Rua Botucatu 743 CEP 04023062 São Paulo- SP- Brazil  
Phone: +55115080 8400 – e-mail: [orlei@uol.com.br](mailto:orlei@uol.com.br)

**Authors:**

**Dafne C. B. Silva** – MD, Master in Pediatrics, Instituto da Criança, Faculty of Medicine, University of Sao Paulo, FMUSP, Brazil. [dafnecbs@gmail.com](mailto:dafnecbs@gmail.com)

**Orlei R. Araujo** - MD, Master in Pediatrics, Pediatric Oncology Institute (GRAACC/IOP), Federal University of Sao Paulo, Brazil. [orlei@uol.com.br](mailto:orlei@uol.com.br)

**Rodrigo G. Arduini** - MD, Pediatric Oncology Institute (GRAACC/IOP), Federal University of Sao Paulo, Brazil. [rodrigogenaro@gmail.com](mailto:rodrigogenaro@gmail.com)

**Carolina F. R. Alonso** - MD, Pediatric Oncology Institute (GRAACC/IOP), Federal University of Sao Paulo, Brazil. [carolinaalonso13@gmail.com](mailto:carolinaalonso13@gmail.com)

**Audrey R. O. Shibata** – MD, Instituto da Criança, Faculty of Medicine, University of Sao Paulo, FMUSP, Brazil. [audrey.shibata@gmail.com](mailto:audrey.shibata@gmail.com).

**Eduardo J. Troster**. PhD, Instituto da Criança, Faculty of Medicine, University of Sao Paulo, FMUSP, Brazil. [troster@einstein.br](mailto:troster@einstein.br)

**Institution:**

Instituto da Criança - Faculty of Medicine, University of Sao Paulo, FMUSP, Brazil.  
Adress: Av. Dr. Eneas Carvalho de Aguiar, 647, São Paulo - SP - Brasil CEP - 05403.000 –  
Phone: +5511 2661- 8500  
Home page: <http://icr.usp.br/>

Key Words: drug toxicity; pharmacovigilance; drug monitoring; intensive care; pediatrics; patient safety.

## ABSTRACT

**Objectives:** To describe adverse drug events (ADEs) in children under intensive care, identify risk factors and tools that can detect ADEs early, and the impact on length of stay (LOS).

**Design:** Prospective, observational study.

**Setting:** Pediatric intensive care unit of a tertiary care teaching hospital.

**Patients:** 239 patients with a mean age of 67.5 months representing 1818 days of hospitalization in intensive care unit .

**Interventions:** Active search of charts and electronic patient records using triggers. The statistical analysis involved linear and logistic regression.

**Measurements and Main Results:** The average LOS was 7.6 days. There were 110 proven, probable, and possible ADEs in 84 patients (35.1%). We observed 138 instances of triggers. The major classes of drugs associated with events were: antibiotics (n = 41), diuretics (n = 24), antiseizures (n = 23), sedatives and analgesics (n = 17), and steroids (n = 18). The number of drugs administered was most related to the occurrence of ADEs and also to the length of stay ( $p < 0.001$ ). The occurrence of an ADE may result in an increase in the length of stay by 1.5 days per event, but this was not statistically significant in this sample. Patient aged less than 48 months also proved to be at significant risk for ADEs, with an odds ratio of 1.84 (confidence interval - 95% CI - 1.07 to 3.15,  $p = 0.025$ ). The number of drugs administered also correlated with the number of ADEs ( $p < 0.0001$ ). The chance of having at least one ADE increased linearly as the patient was administered more drugs.



1  
2  
3 **Conclusions:** The use of multiple drugs as well as lower patient age favors the occurrence  
4 of ADEs. The active search described here provides a systematic approach to this problem.  
5  
6  
7  
8  
9

## 10 INTRODUCTION

11  
12 The use of medication in children and infants is a matter of great concern largely due to the  
13 vulnerability of their constantly changing and developing homeostasis, as well as the  
14 unique mechanisms by which different children respond to injuries. There are important  
15 differences in absorption, distribution, metabolism and excretion of drugs during childhood  
16 and early adolescence.<sup>1</sup> In addition, safety of several medications has not been properly  
17 evaluated in the pediatric age group, while others are prescribed differently than  
18 recommended for adults; key differences include dose and frequency of administration,  
19 drug formulation, route of administration, or indication for use in childhood (i.e. "off-label"  
20 use), and each of these factors can vary depending on the age of the child.<sup>2</sup> Most of times,  
21 recommended doses of drugs used in children are based on extrapolations from adult doses,  
22 related only to weight, body surface area, and age, often ignoring their pharmacokinetic and  
23 pharmacodynamic properties; this results in increased susceptibility of children to drug-  
24 related adverse events.<sup>1-4</sup>  
25  
26  
27  
28  
29  
30  
31  
32  
33  
34  
35  
36  
37  
38  
39  
40  
41  
42

43 Reports documenting the incidence of adverse drug events in the pediatric  
44 population range from 4.3% to 16.7%; 12.2% of these events being serious in nature, with  
45 high morbidity and mortality.<sup>5</sup> Hospitalized children may be at a higher risk of an adverse  
46 event, as doses, drug safety, and effectiveness are often difficult to determine.<sup>6</sup> Kaushal  
47 and colleagues identified that the potential frequency of ADEs in children is three times  
48 higher than a previous study focused on ADEs in adults, however, the rate of avoidable  
49 ADEs was similar.<sup>4</sup> In intensive care units, multiple, potentially hazardous drugs are  
50  
51  
52  
53  
54  
55  
56  
57  
58  
59  
60

1  
2  
3 routinely administered, such as inotropes, sedation medications, analgesia, and antibiotics;  
4  
5 as the risk of an ADE increases by 1.7% for each additional drug used,<sup>5</sup> it is far more likely  
6  
7 that adverse reactions will occur in the ICU.  
8  
9

10 There are few studies documenting safety in drug administration in children in the  
11 ICU. The primary objective of this study was to describe ADEs in children admitted to the  
12 pediatric ICU (PICU) of a tertiary care hospital in Sao Paulo, Brazil. As secondary  
13 objectives, we attempted to identify risk factors for such events and tools that could detect  
14 them early as well as determine if there was impact on LOS.  
15  
16  
17  
18  
19  
20  
21  
22  
23

## 24 MATERIALS AND METHODS

25  
26 We conducted a preliminary survey over a period of 22 days in March 2004 to  
27 identify the number of admissions required to effectively report ADEs in the PICU, a unit  
28 of 13 beds, with average occupation of 80%. Based on the results of this survey, we  
29 determined that it would then be necessary to study 150 admissions to reach a stable  
30 estimate of the incidence of ADEs and explore possible risk factors using a multivariate  
31 analysis (approximately 10 ADEs for each variable potentially associated). The study  
32 population consisted of consecutive admissions to the PICU between October 1, 2005 and  
33 March 31, 2006. The strategy to identify ADEs was through an active search, using pre-  
34 established parameters ("triggers"). A "trigger" can be defined as an occurrence, prompt, or  
35 flag, found when reviewing a patient's medical chart, that requires further investigation to  
36 determine the presence or absence of an adverse event.<sup>7,8</sup> Using this method, specific  
37 events, such as prescription or abrupt discontinuation of certain medications, prescription of  
38 antidotes, and some laboratory tests, serve as indicators for further investigation. Several  
39 triggers have been described in the literature,<sup>8</sup> and therefore we chose and adapted the ones  
40  
41  
42  
43  
44  
45  
46  
47  
48  
49  
50  
51  
52  
53  
54  
55  
56  
57  
58  
59  
60

1  
2  
3 that seemed more consistent with the drugs commonly used in our PICU. Table 1 shows  
4 these triggers and the rationale for their use. The positive predictive value (PPV) of each  
5 trigger was calculated as the number of times that each trigger identified an ADE, divided  
6 by the total number of times the triggers were identified in the active search.  
7  
8  
9

10 The following methodology was undertaken for active search:

11  
12  
13 1. The admission form for each new patient in the PICU was entered by two trained  
14 intensive care pediatricians; data were analyzed and consolidated by 2 authors (Drs. Silva  
15 and Shibata).  
16  
17  
18  
19

20  
21  
22 2. The following records for each patient were reviewed, guided by triggers indicative of  
23 adverse events:  
24

25 - Laboratory tests (electronic database);  
26

27 - Clinical annotations;  
28

29 - Nursing annotations;  
30

31 - Prescription;  
32  
33

34  
35 3. The Naranjo algorithm was applied to classify the cause of the ADE: proven, probable,  
36 possible, or doubtful;<sup>9</sup>  
37  
38

39 4. Analysis of all proven, probable and possible ADEs.  
40  
41  
42

43 The study included only unavoidable ADEs, that is, only those that occurred during  
44 normal use of a drug, and not the result of a human error,<sup>10</sup> as well as those classified as  
45 moderate to severe according to the World Health Organization (WHO) guidelines: By this  
46 definition (WHO), ADE is any detrimental or undesirable event, unintended, which appears  
47 after administration of a drug at doses normally used for prophylaxis, diagnosis or  
48 treatment of a disease. A moderate reaction is one that requires modification of therapy and  
49 may require specific treatment; a severe reaction is potentially fatal and requires specific  
50  
51  
52  
53  
54  
55  
56  
57  
58  
59  
60

1  
2  
3 treatment, requires or prolongs hospitalization.<sup>11</sup> We analyzed only those ADEs that  
4  
5 appeared after admission. ADEs that appeared after admission but were related to drugs  
6  
7 that the patient was receiving before being admitted were defined as due to “prevalent  
8  
9 drug”. This definition eliminated, for example, ADEs due to chemotherapy already present  
10  
11 before admission in patients with cancer. ADEs related to drugs introduced after admission  
12  
13 were classified as due to “incident drug”. The study protocol was reviewed and approved  
14  
15 by the Ethics Committee of the institution prior to the start of data collection (protocol  
16  
17 number 485/56/2005). Because of the observational nature of the study, without any  
18  
19 interference in therapy, informed consent was waived.  
20  
21  
22  
23

24  
25 Statistical analysis was performed using SPSS and Microsoft Excel, obtaining the  
26  
27 odds ratios (OR) by logistic regression. A multinomial logistic regression model was  
28  
29 performed with the variables “Presence of chronic disease”, “Age”, “Gender”, “Number of  
30  
31 drugs” (independent) and “ADEs” (dependent). We chose the variables “Age” and “number  
32  
33 of drugs” because they have been significantly correlated with the incidence of ADEs.<sup>5</sup>  
34  
35 Some studies have shown a lower risk for ADEs in male children.<sup>12</sup> Chronic illness is an  
36  
37 important variable due to the continuous use of various drugs and the presence of organ  
38  
39 dysfunction. We used also a linear regression model for the variables “ADEs”, “Presence of  
40  
41 chronic disease”, “Age”, “Gender”, “Number of drugs” (independent), and “LOS”  
42  
43 (dependent). Significance of differences between means was obtained with the T test.  
44  
45 Variables involving time were analyzed using the Kaplan-Meier method, and  $p < 0.05$  was  
46  
47 considered statistically significant.  
48  
49  
50  
51  
52  
53  
54

## 55 RESULTS

56  
57  
58  
59  
60

1  
2  
3 In our pilot survey, we identified 20 adverse events of moderate to severe intensity  
4 over a period of 22 days in March 2004, which we calculated to represent at least 5 events  
5 per 100 patient-days.  
6  
7  
8  
9

10 In our actual study, there were 244 admissions to the PICU during the period  
11 between October 1, 2005 and March 31, 2006. Four patients were excluded because they  
12 were adult living-donors for liver transplant, and one patient was excluded due to age > 18  
13 years. We analyzed the remaining 239 patients, representing a total of 1818 days of PICU  
14 hospitalization. The average length of stay was 7.6 days with a standard deviation (SD) of  
15 9.5 days.  
16  
17  
18  
19  
20  
21  
22  
23

24 The mean age was 67.5 months (median 51 months, range 1-243), and 113 patients  
25 (47.2%) were younger than 48 months. Ninety-four of the 239 patients were male (39.3%).  
26 Only 39 of the 239 patients did not have a chronic disease at admission (16.3%); the most  
27 prevalent chronic diseases were cancer (n = 48, 20%), hepatic disease (n = 37, 15.4%),  
28 neurological disease (n = 28, 11.7%), respiratory disease (n = 28, 11.7 %), and cardiac  
29 disease (n = 12, 5%). Admissions were mostly due to respiratory failure (n = 83),  
30 postoperative of neurosurgical, general, or cardiac surgery (n = 52), decreased level of  
31 consciousness (n = 14), or sepsis/septic shock (n = 28). Other causes were seizures,  
32 digestive bleeding, dehydration, renal failure, hypertension, and others.  
33  
34  
35  
36  
37  
38  
39  
40  
41  
42  
43  
44  
45

46 We observed 138 occurrences of triggers, as shown in Table 2, with their predictive  
47 positive values. These triggers led to the identification of 110 proven, probable, or possible  
48 ADEs in 84 patients (35.1%) during the six month study period, resulting in a rate of 60.5  
49 ADEs / 1,000 patient-days; 21 patients had more than one ADE. Thirty-nine ADEs were  
50 due to prevalent drugs and the remaining 71 (64.5%) were related to drugs introduced after  
51  
52  
53  
54  
55  
56  
57  
58  
59  
60

1  
2  
3 PICU admission or “incidents” (Table 3). Table 4 shows the observed ADEs and related  
4  
5  
6 drugs.

7  
8 Gender, the presence of chronic disease, age, and administration of at least five  
9  
10 drugs were included in a multinomial logistic regression analysis as independent variables  
11  
12 for the incidence of ADEs (dependent variable); for males, the odds ratio (OR) was 1.31 (p  
13  
14 = 0.33); for the presence of a chronic disease, the OR was 0.71 (p = 0.35), and none of the  
15  
16 individual chronic conditions displayed an increased risk for ADEs; however, patient age  
17  
18 less than 48 months proved to be a significant risk factor, with an OR of 2.1 (95% CI: 1.19  
19  
20 - 3.72, p = 0.01). There was a positive interaction in patients aged less than 48 months and  
21  
22 concomitant administration of at least five drugs (OR = 2.05, 95% CI: 1.18-3.57, p = 0.01)  
23  
24 in the occurrence of at least one ADE. This interaction remained significant, with discrete  
25  
26 elevation of the OR until 9 concomitant drugs were administered (OR = 2.03, 95% CI:  
27  
28 1.15-3.60, p = 0.014, for age < 48 months; and OR = 4.69, 95% CI: 2.41-9.15, p < 0.0001  
29  
30 for the use of 9 drugs).  
31  
32  
33  
34  
35

36  
37 In a bivariate analysis, the number of drugs received by each patient correlated with  
38  
39 the number of ADEs ( $R^2 = 0.13$ , p < 0.0001). The likelihood of at least one ADE became  
40  
41 significant when the patient was given at least 5 drugs at the same time (OR 2.19 – 95% CI:  
42  
43 1.14 – 4.20, p = 0.018). We observed a linear elevation of the chance of an occurrence of an  
44  
45 ADE as the patient was administered more medications, achieving an OR of 7.26 (95% CI:  
46  
47 2.77 - 19.1, p < 0.0001) with 11 concomitant drugs. The same was observed for the  
48  
49 occurrence of more than one ADE (Table 5).  
50  
51  
52

53  
54 There was a significant difference between the mean LOS between patients with  
55  
56 and without ADEs (11.1 vs. 5.3 days, p < 0.0001). In a bivariate linear regression model  
57  
58 (LOS as the dependent variable and ADEs as independent), the slope coefficient was 2.75  
59  
60

1  
2  
3 (p = 0.001), meaning that each ADE corresponded to an increase of 2.75 days in the LOS.  
4  
5  
6 However, this increase was not maintained when other confounding variables were added  
7  
8 in the multivariate regression model. The only independent variables remaining in the final  
9  
10 model that affected LOS were the number of ADEs (p = 0.089; slope coefficient 1.49) and  
11  
12 the number of drugs (p < 0.001; slope coefficient 0.83; R<sup>2</sup> = 0.104); The slope coefficient  
13  
14 could indicate an increase in LOS of 1.49 days for each ADE, if statistically significant, but  
15  
16 the study did not have the power to demonstrate it. A sample calculation showed that in  
17  
18 order for this fact to be significant in a larger sample, it would take 1000 patients to achieve  
19  
20 p < 0.05 with a power of 0.94, considering the observed standard deviation of 9.5 for the  
21  
22 dependent variable “LOS” and 0.72 for independent “number of ADEs”. Other variables  
23  
24 did not show any significant relationship.  
25  
26  
27  
28

29 In addition, mean “survival” without ADEs (time from admittance to the PICU until  
30  
31 the occurrence of an ADE) was 19 days for patients older than 48 months and 11.2 days for  
32  
33 patients younger than 48 months (p = 0.017).  
34  
35

36 The drug classes involved in ADEs were: antibiotics (n = 41), diuretics (24),  
37  
38 antiseizures (23), sedatives and analgesics (17), steroids (18), antihypertensives (9),  
39  
40 bronchodilators (8), gastric protectors (3), immunosuppressives (4), vasoactive drugs (5),  
41  
42 hormonal analogues (4), antipyretics (4), and others (5).  
43  
44  
45  
46  
47

## 48 **DISCUSSION**

49  
50 Determining the occurrence of adverse events in an intensive care environment is a  
51  
52 complex task. The symptoms of the event may overlap the underlying disease and may be  
53  
54 caused by several unrelated factors including the pharmacokinetic profile of the drug,  
55  
56 unknown drug allergies of each patient, or human error. These difficulties may serve as an  
57  
58  
59  
60

1  
2  
3 explanation for why many events are not recognized as ADEs. Frequently, other drugs are  
4 administered in an attempt to solve the problem created by the ADE, without the specific  
5 diagnosis. While some events are easily attributed to certain drugs, there are several  
6 possible and poorly documented events and some are completely unknown and rare. There  
7 are also a multitude of patient-specific risk-factors leading to the occurrence of an ADE,  
8 including age and certain comorbidities, such as the presence of renal or hepatic  
9 impairment. Drug-related factors such as toxicity, time of administration, dosage, and  
10 duration of use are variables that can also impact the probability of ADEs. In addition, new  
11 drugs that have just completed phase III clinical trials may not have been powered to detect  
12 rare events.<sup>13</sup> In general, if we don't look for ADEs, it is unlikely that we will find them.<sup>14</sup>  
13  
14  
15  
16  
17  
18  
19  
20  
21  
22  
23  
24  
25  
26

27 In the absence of reliable empirical methods for detection of ADEs, formal and  
28 logical tools can help differentiate an ADE from a symptom caused by exacerbations in a  
29 patient's underlying condition. The most widely accepted formal instrument to obtain this  
30 is the Naranjo algorithm; however, this tool is also not without bias: in our sample, only 5  
31 of 110 ADEs were classified as "proven" or definite (scores 9 and 10). Therefore, some  
32 included events may not have been ADEs. However, to prove an ADE according to the  
33 algorithm, it is necessary to re-administer the drug and observe the event again, or obtain  
34 serum levels that are known to be toxic. The first option is strongly discouraged and the  
35 second may be technically impossible or unavailable. However, we excluded the "doubtful"  
36 events (score equal to or less than 1) from our analysis and some of these events may have  
37 actually been ADEs.  
38  
39  
40  
41  
42  
43  
44  
45  
46  
47  
48  
49  
50  
51  
52

53 Most of our patients had chronic diseases, which may contribute to a higher  
54 incidence of ADEs, due to the use of multiple medications. This population of chronic  
55 patients reflects the current reality of Brazilian university hospitals. We observed no  
56  
57  
58  
59  
60



1  
2  
3 significant difference in ADE incidence between patients with and without chronic  
4 diseases, which can be explained by the exclusion of events prior to PICU admission and  
5  
6 was more likely related to the medications used regularly.  
7  
8  
9

10 The incidence of observed events (35.1% of admissions) is much higher than those  
11 reported in adult patients hospitalized in ICUs (around 9%).<sup>15</sup> Furthermore, we found that  
12 younger children under the age of 48 months, which constitute approximately half the  
13 patient sample, were more likely to have ADEs. This was particularly significant with the  
14 administration of over five drugs at the same time, and also resulted in an ADE earlier in  
15 the patient's ICU stay. The high incidence of ADEs also highlights the importance of an  
16 active search focused on triggers to detect ADEs in children: Holdsworth et al reported  
17 ADE rates of 6 per 100 admissions (ICU and pediatric ward, determined using a chart  
18 review by a pharmacist).<sup>16</sup> Takata et al. performed a search focused on triggers and reported  
19 11.1 events/100 inpatients, almost double that of the retrospective study. These authors  
20 indicated that performing a search focused on specific circumstances associated with ADEs  
21 in specific elements of the patient's chart can increase the rates of observed ADEs.<sup>17</sup> The  
22 methodology we used in this study (definition of triggers and daily search in the records of  
23 patients) is a simple way to perform an active search for ADEs. Triggers can be  
24 individualized for each hospital setting according to the most frequently used medications.  
25 PPVs can be determined through a simple calculation that assists in the choice of triggers  
26 that are most useful in each unit. We observed higher PPVs for biochemical alterations; in  
27 an automated process, the system of the laboratory itself could alert for possible ADEs.  
28  
29  
30  
31  
32  
33  
34  
35  
36  
37  
38  
39  
40  
41  
42  
43  
44  
45  
46  
47  
48  
49  
50  
51  
52  
53  
54

55 We wish to highlight that our study evaluated severely ill children under intensive  
56 care receiving multiple drugs (up to 18), and the chances of developing an ADE is  
57  
58  
59  
60

1  
2  
3 therefore, more likely. In addition, comparing event rates is also challenging and potentially  
4 misleading as definitions of ADEs are unclear among studies, ranging from a benign and  
5  
6 transient alteration of electrolytes to vital organ damage.<sup>10</sup>  
7  
8

9  
10 We investigated whether ADEs may have an impact on the LOS in the PICU. The  
11 most important limitation of the study was that our sample did not have the power to  
12 implicate ADEs as a causative factor in prolonging PICU stays by 1.5 days; however,  
13 calculations based on standard deviations observed in our sample showed a high probability  
14 that this would be true in a longer-term study. In addition to possible patient harm, there are  
15 significant costs associated with patient stays in the ICU: An increase of 1.5 days per event  
16 results in an additional 330 days per year. Estimating cost at \$600.00 (American dollars)  
17 each day, ADEs amount to \$198,000 per year, which is a considerable sum for our public  
18 health system. In principle, the events occurred as a result of habitual use of drugs and were  
19 therefore "inevitable"; however, a systematic approach could convert some ADEs from  
20 presumably inevitable to avoidable. A good example cited by Kane-Gill et al<sup>10</sup> describes  
21 bleeding caused by the correct dose of heparin in a patient being monitored by partial  
22 thromboplastin time and would be classified as inevitable. If an investigation identified that  
23 the laboratory has changed their method for thromboplastin time and failed to communicate  
24 the necessary adjustment, the error would become preventable. More studies on  
25 pharmacokinetics and drug interactions in children are required to define optimal dosing  
26 regimens and reduce ADEs.  
27  
28  
29  
30  
31  
32  
33  
34  
35  
36  
37  
38  
39  
40  
41  
42  
43  
44  
45  
46  
47  
48  
49

50 Another limitation of the study was the short time of observation, which did not  
51 include the seasonality of respiratory diseases. A positive aspect of the study was the  
52 analysis of a PICU population in a country outside Europe and North America, therefore  
53 making it possible to analyze ADEs due to drugs such as dipyrene. In Brazil, the reporting  
54  
55  
56  
57  
58  
59  
60

1  
2  
3 of ADEs is incipient. The online system provided by the health authority only receives  
4  
5 notifications, which are not mandatory. Active search is not utilized, even in private  
6  
7 institutions. We hope that our study will contribute to a future systematic approach to this  
8  
9 subject in developing countries.  
10  
11

## 12 13 14 15 **CONCLUSIONS**

16  
17 The use of multiple drugs as well as lower patient age favors the occurrence of ADEs,  
18  
19 which in turn may result in an increase in the length of PICU hospitalization. The use of an  
20  
21 active search using triggers can provide a systematic approach to identify ADEs in PICUs.  
22  
23  
24  
25  
26  
27  
28

## 29 **REFERENCES**

- 30  
31  
32 1. Niederhauser VP. Prescribing for children: issues in pediatric pharmacology. *Nurse*  
33  
34 *Pract* 1997;22(3):16-18.  
35  
36 2. Hussain E, Kao E. Medication safety and transfusion errors in the ICU and beyond.  
37  
38 *Crit Care Clin* 2005;21:91-110.  
39  
40 3. Wilson RM, Runciman WB, Gibberd RW, Harrison BT, Newby L, Hamilton JD.  
41  
42 The Quality in Australian Health Care Study. *Med J Aust* 1995;163:458-471.  
43  
44 4. Kaushal R, Bates DW, Landrigan C, et al. Medication errors and adverse drug  
45  
46 events in pediatric inpatients. *JAMA* 2001;285:2114-2120.  
47  
48  
49 5. Impicciatore P, Choonara I, Clarkson A, Provasi D, Pandolfini C, Bonati M.  
50  
51 Incidence of adverse drug reactions in paediatric in/out-patients: a systematic review and  
52  
53 meta-analysis of prospective studies. *Br J Clin Pharmacol* 2001;52:77-83.  
54  
55  
56  
57  
58  
59  
60

- 1  
2  
3 6. Gill AM, Leach HJ, Hughes J, Barker C, Nunn AJ, Choonara I. Adverse drug  
4 reactions in a paediatric intensive care unit. *Acta Paediatr* 1995;84:438-441.  
5  
6
- 7  
8 7. Rozich JD, Haraden CR, Resar RK. Adverse drug event trigger tool: a practical  
9 methodology for measuring medication related harm. *Qual Saf Health Care*  
10 2003;12(3):194–200.  
11  
12
- 13  
14 8. Resar RK, Rozich JD, Classen DC. Methodology and rationale for the measurement  
15 of harm with trigger tools. *Qual Saf Health Care* 2003;12(suppl 2):ii39 –ii45.  
16  
17
- 18  
19 9. Naranjo CA, Busto U, Sellers EM, et al. A method for estimating the probability of  
20 adverse drug reactions. *Clin Pharmacol Ther* 30 (2): 239–245.  
21  
22
- 23  
24 10. Kane-Gill SL, Kirisci L, Verrico MM, Rothschild JM. Analysis of risk factors for  
25 adverse drug events in critically ill patients. *Crit Care Med* 2012;40(3):823-8.  
26  
27
- 28  
29 11. World Health Organization (WHO). Council for International Organizations of  
30 Medical Sciences. Guidelines for preparing core clinical safety information on drug from  
31 CIOMS Working Group III. Geneva; 1995.  
32  
33
- 34  
35 12. Smyth RM, Gargon E, Kirkham J, Cresswell L, Golder S, Smyth R, Williamson P.  
36 Adverse drug reactions in children-a systematic review. *PLoS One*. 2012;7(3):e24061.  
37  
38
- 39  
40 13. Brown SD Jr, Landry FJ. Recognizing, reporting, and reducing adverse drug  
41 reactions. *South Med J* 2001;94(4):370-3.  
42  
43
- 44  
45 14. Kelly WN. How Can I Recognize an Adverse Drug Event. Available online at:  
46 <http://www.medscape.org/viewarticle/569794>. Accessed Feb 1, 2012.  
47  
48
- 49  
50 15. Vargas E, Terleira A, Hernando F, Perez E, Cordon C, Moreno A, Portoles A.  
51 Effect of adverse drug reactions on length of stay in surgical intensive care units. *Crit Care*  
52  
53  
54  
55  
56  
57  
58  
59  
60

16. Holdsworth MT, Fichtl RE, Behta M, et al. Incidence and impact of adverse drug events in pediatric inpatients. *Arch Pediatr Adolesc Med* 2003;157(1):60–65.

17. Takata GS, Mason W, Taketomo C, Logsdon T, Sharek PJ. Development, testing, and findings of a pediatric-focused trigger tool to identify medication-related harm in US children's hospitals. *Pediatrics* 2008;121(4):e927-3.

Table 1 – rationale for the use of triggers

| Triggers                               | Rationale for use                                                                                                                             |
|----------------------------------------|-----------------------------------------------------------------------------------------------------------------------------------------------|
| Hematological alterations              | Anemia, leukopenia, and thrombocytopenia are adverse reactions of various drugs                                                               |
| Biochemical alterations                | Hyponatremia, hypokalemia, elevated BUN and creatinine are common events with various drugs                                                   |
| Cardiac alterations                    | Tachycardia is common, for example, with beta-adrenergic agents, which can cause other arrhythmias; bradycardia may occur with beta-blockers  |
| Antihistamines                         | Indicator of allergic reaction                                                                                                                |
| Corticoids                             | Potential indicator of allergic reaction                                                                                                      |
| Allergic reactions                     | Frequently reported adverse events                                                                                                            |
| Non-programmed endotracheal intubation | Potential indicator of respiratory depression, common, for example, with benzodiazepines                                                      |
| Level of consciousness degradations    | Common with benzodiazepines, anticonvulsants                                                                                                  |
| Drug interactions                      | For example, hypotension and lethargy caused by concomitant administration of sedatives and anticonvulsants                                   |
| Antiseizures prescription              | Potential indicative of unexpected seizure, when using medications that may lead to changes in electrolytes and seizures, like amphotericin B |
| Drug intolerance                       | For example, vomiting and diarrhea, frequent events with various medications, such as antibiotics                                             |
| Non-programmed suspension of drug      | Indicative of intolerance or adverse reaction                                                                                                 |

|    |                                         |                                         |
|----|-----------------------------------------|-----------------------------------------|
| 1  |                                         |                                         |
| 2  |                                         |                                         |
| 3  | Fever                                   | Adverse event of drugs such as          |
| 4  |                                         | amphotericin B                          |
| 5  | Sudden death                            | Already reported with drug              |
| 6  |                                         | combinations containing dipyrone        |
| 7  | Serum level alteration                  | for monitored drugs such as             |
| 8  |                                         | vancomycin and phenobarbital, with a    |
| 9  |                                         | narrow therapeutic range and            |
| 10 |                                         | potentially toxic at high levels        |
| 11 | Aminophylline / adrenaline prescription | Potential indicators of severe allergic |
| 12 |                                         | reactions                               |
| 13 | Antidotes prescription                  | For example, the use of flumazenil      |
| 14 |                                         | may indicate adverse events due to the  |
| 15 |                                         | use of benzodiazepines                  |
| 16 | Others                                  | Adverse events discovered in the        |
| 17 |                                         | review of medical records, and that     |
| 18 |                                         | does not fit in any trigger, being the  |
| 19 |                                         | trigger the event itself                |
| 20 |                                         |                                         |
| 21 |                                         |                                         |
| 22 |                                         |                                         |
| 23 |                                         |                                         |
| 24 |                                         |                                         |
| 25 |                                         |                                         |
| 26 |                                         |                                         |
| 27 |                                         |                                         |

28 *Table 2 – Occurrences of triggers used for active search.*

| 29 <b>Triggers</b>              | 30 <b>Number of occurrences</b> | 31 <b>Positive predictive value</b> |
|---------------------------------|---------------------------------|-------------------------------------|
| 32 Hematological alterations    | 8                               | 5.79%                               |
| 33 Biochemical alterations      | 64                              | 46.37%                              |
| 34 Cardiac alterations          | 17                              | 12.3%                               |
| 35 Antihistamines               | 5                               | 3.62%                               |
| 36 Corticoids                   | 2                               | 1.45%                               |
| 37 Allergic reactions           | 11                              | 7.97%                               |
| 38 Non-programmed endotracheal  | 1                               | 0.72%                               |
| 39 intubation                   |                                 |                                     |
| 40 Level of consciousness       | 2                               | 1.45%                               |
| 41 degradations                 |                                 |                                     |
| 42 Drug interactions            | 8                               | 5.80%                               |
| 43 Antiseizures prescription    | 2                               | 1.45%                               |
| 44 Drug intolerance             | 0                               | 0%                                  |
| 45 Non-programmed suspension of | 1                               | 0.72%                               |
| 46 drug                         |                                 |                                     |
| 47 Fever                        | 0                               | 0%                                  |
| 48 Sudden death                 | 0                               | 0%                                  |
| 49 Serum level alteration       | 0                               | 0%                                  |
| 50 Aminophylline / adrenaline   | 0                               | 0%                                  |
| 51 prescription                 |                                 |                                     |
| 52 Antidotes prescription       | 3                               | 2.17%                               |
| 53 Others                       | 14                              | 10.14%                              |
| 54                              |                                 |                                     |
| 55                              |                                 |                                     |
| 56                              |                                 |                                     |
| 57                              |                                 |                                     |
| 58                              |                                 |                                     |
| 59                              |                                 |                                     |
| 60                              |                                 |                                     |

Table 3 – Distribution of prevalent-drug and incident-drug adverse events according to causality.

| ADE      | Prevalent-drug | Incident-drug | TOTAL |
|----------|----------------|---------------|-------|
| Proven   | 0              | 5             | 5     |
| Probable | 12             | 32            | 44    |
| Possible | 27             | 34            | 61    |
| TOTAL    | 39             | 71            | 110   |

Table 4 – Observed adverse drug events (ADEs) and related drugs

| Adverse Drug Events (ADEs)             | N  | Related drugs                                                                                                                                      |
|----------------------------------------|----|----------------------------------------------------------------------------------------------------------------------------------------------------|
| Hyponatremia                           | 27 | furosemide, fentanyl, carbamazepine, vigabatrin<br>topiramate, hydrochlorothiazide, somatostatin,<br>vancomycin, rifampicin, ranitidine, phenytoin |
| Hyperglycemia                          | 17 | dexamethasone, hydrocortisone,<br>methylprednisolone, terbutaline, tacrolimus                                                                      |
| Hypokalemia                            | 13 | amphotericin b, terbutaline, furosemide,<br>ranitidine                                                                                             |
| Skin rash and urticaria                | 11 | vancomycin, dipyrone, cefepime, ceftriaxone,<br>levetiracetam, dipyrone, rasburicase                                                               |
| Hypoventilation/desaturation of oxygen | 6  | midazolam, propofol, fentanyl, morphine,<br>diazepam                                                                                               |
| Bradycardia                            | 4  | midazolam                                                                                                                                          |
| Hypotension                            | 4  | midazolam, furosemide, thiopental,<br>chlorpromazine                                                                                               |
| Liver enzyme abnormalities             | 4  | meropenem, carbamazepine, amlodipine,<br>carvedilol, clonidine, amitriptyline,<br>phenobarbital                                                    |
| Hypertension                           | 3  | prednisone tacrolimus, dopamine                                                                                                                    |
| Increased BUN and creatinine           | 3  | vancomycin, tacrolimus                                                                                                                             |
| Seizure                                | 2  | hydrocortisone, liposomal amphotericin B,<br>cefepime                                                                                              |
| Tachycardia                            | 2  | terbutaline                                                                                                                                        |
| Anemia                                 | 2  | ketoprofen, paracetamol                                                                                                                            |
| Extrasystole                           | 2  | carvedilol, terbutaline                                                                                                                            |
| Increased number of platelets          | 2  | Meropenem, ceftriaxone                                                                                                                             |
| Vomiting                               | 2  | Nitroprusside, tacrolimus                                                                                                                          |
| Cardiorespiratory arrest               | 1  | dipyrone                                                                                                                                           |
| Thrombocytopenia                       | 1  | dipyrone                                                                                                                                           |
| Apnea                                  | 1  | phenytoin                                                                                                                                          |
| Leukopenia                             | 1  | imipenem                                                                                                                                           |

|                          |   |                                 |
|--------------------------|---|---------------------------------|
| Stevens-Johnson syndrome | 1 | trimethoprim / sulfamethoxazole |
| Eosinophilia             | 1 | ceftriaxone                     |

Table 5 – Odds ratios related to the concomitant use of medications.

| Number of drugs | Occurrence of at least one ADE |            |          | Occurrence of more than one ADE |            |          |
|-----------------|--------------------------------|------------|----------|---------------------------------|------------|----------|
|                 | <i>Odds ratio</i>              | 95% CI     | <i>P</i> | <i>Odds ratio</i>               | 95% CI     | <i>P</i> |
| 5               | 2.19                           | 1.14-4.2   | 0.018    | 2.38                            | 0.67-8.38  | 0.175    |
| 6               | 3.03                           | 1.69-5.40  | 0.0002   | 3.28                            | 1.06-10.07 | 0.037    |
| 7               | 3.69                           | 2.11-6.46  | < 0.0001 | 2.95                            | 1.14-7.60  | 0.025    |
| 8               | 3.84                           | 2.24-6.80  | < 0.0001 | 3.35                            | 1.34-8.35  | 0.009    |
| 9               | 4.40                           | 2.29-8.45  | < 0.0001 | 3.14                            | 1.24-7.90  | 0.015    |
| 10              | 6.48                           | 2.85-14.77 | < 0.0001 | 3.69                            | 1.36-9.99  | 0.010    |
| 11              | 7.26                           | 2.77-19.01 | < 0.0001 | 5.55                            | 1.98-15.52 | 0.001    |



1  
2  
3 **TITLE PAGE**  
4

5 **ADVERSE DRUG EVENTS IN A PEDIATRIC INTENSIVE CARE UNIT: A**  
6  
7 **PROSPECTIVE COHORT**  
8  
9

10 Correspondent author: Orlei Ribeiro de Araujo.  
11 Address: Rua Botucatu 743 CEP 04023062 São Paulo- SP- Brazil  
12 Phone: +55115080 8400 – e-mail: [orlei@uol.com.br](mailto:orlei@uol.com.br)  
13

14  
15 **Authors:**  
16

17 **Dafne C. B. Silva** – MD, Master in Pediatrics, Instituto da Criança, Faculty of Medicine,  
18 University of Sao Paulo, FMUSP, Brazil. [dafnecbs@gmail.com](mailto:dafnecbs@gmail.com)  
19

20 **Orlei R. Araujo** - MD, Master in Pediatrics, Pediatric Oncology Institute (GRAACC/IOP),  
21 Federal University of Sao Paulo, Brazil. [orlei@uol.com.br](mailto:orlei@uol.com.br)  
22

23 **Rodrigo G. Arduini** - MD, Pediatric Oncology Institute (GRAACC/IOP), Federal  
24 University of Sao Paulo, Brazil. [rodrigogenaro@gmail.com](mailto:rodrigogenaro@gmail.com)  
25

26 **Carolina F. R. Alonso** - MD, Pediatric Oncology Institute (GRAACC/IOP), Federal  
27 University of Sao Paulo, Brazil. [carolinaalonso13@gmail.com](mailto:carolinaalonso13@gmail.com)  
28

29 **Audrey R. O. Shibata** – MD, Instituto da Criança, Faculty of Medicine, University of  
30 Sao Paulo, FMUSP, Brazil. [audrey.shibata@gmail.com](mailto:audrey.shibata@gmail.com)  
31

32 **Eduardo J. Troster**. PhD, Instituto da Criança, Faculty of Medicine, University of Sao  
33 Paulo, FMUSP, Brazil. [troster@einstein.br](mailto:troster@einstein.br)  
34

35  
36 **Institution:**  
37

38 Instituto da Criança - Faculty of Medicine, University of Sao Paulo, FMUSP, Brazil.  
39 Adress: Av. Dr. Eneas Carvalho de Aguiar, 647, São Paulo - SP - Brasil CEP - 05403.000 –  
40 Phone: +5511 2661- 8500  
41 Home page: <http://icr.usp.br/>  
42

43  
44  
45  
46  
47  
48  
49  
50  
51  
52  
53  
54  
55  
56  
57  
58  
59  
60  
Key Words: drug toxicity; pharmacovigilance; drug monitoring; intensive care; pediatrics;  
patient safety.

## ABSTRACT

**Objectives:** To describe adverse drug events (ADEs) in children under intensive care, identify risk factors and tools that can detect ADEs early, and the impact on length of stay (LOS).

**Design:** Prospective, observational study.

**Setting:** Pediatric intensive care unit of a tertiary care teaching hospital.

**Patients:** 239 patients with a mean age of 67.5 months representing 1818 days of hospitalization in intensive care unit .

**Interventions:** Active search of charts and electronic patient records using triggers. The statistical analysis involved linear and logistic regression.

**Measurements and Main Results:** The average LOS was 7.6 days. There were 110 proven, probable, and possible ADEs in 84 patients (35.1%). We observed 138 instances of triggers. The major classes of drugs associated with events were: antibiotics (n = 41), diuretics (n = 24), antiseizures (n = 23), sedatives and analgesics (n = 17), and steroids (n = 18). The number of drugs administered was most related to the occurrence of ADEs and also to the length of stay ( $p < 0.001$ ). The occurrence of an ADE may result in an increase in the length of stay by 1.5 days per event, but this was not statistically significant in this sample. Patient aged less than 48 months also proved to be at significant risk for ADEs, with an odds ratio of 1.84 (confidence interval - 95% CI - 1.07 to 3.15,  $p = 0.025$ ). The number of drugs administered also correlated with the number of ADEs ( $p < 0.0001$ ). The chance of having at least one ADE increased linearly as the patient was administered more drugs.

1  
2  
3 **Conclusions:** The use of multiple drugs as well as lower patient age favors the occurrence  
4 of ADEs. The active search described here provides a systematic approach to this problem.  
5  
6  
7  
8  
9

## 10 INTRODUCTION

11  
12 The use of medication in children and infants is a matter of great concern largely due to the  
13 vulnerability of their constantly changing and developing homeostasis, as well as the  
14 unique mechanisms by which different children respond to injuries. There are important  
15 differences in absorption, distribution, metabolism and excretion of drugs during childhood  
16 and early adolescence.<sup>1</sup> In addition, safety of several medications has not been properly  
17 evaluated in the pediatric age group, while others are prescribed differently than  
18 recommended for adults; key differences include dose and frequency of administration,  
19 drug formulation, route of administration, or indication for use in childhood (i.e. "off-label"  
20 use), and each of these factors can vary depending on the age of the child.<sup>2</sup> Most of times,  
21 recommended doses of drugs used in children are based on extrapolations from adult doses,  
22 related only to weight, body surface area, and age, often ignoring their pharmacokinetic and  
23 pharmacodynamic properties; this results in increased susceptibility of children to drug-  
24 related adverse events.<sup>1-4</sup>  
25  
26  
27  
28  
29  
30  
31  
32  
33  
34  
35  
36  
37  
38  
39  
40  
41  
42

43 Reports documenting the incidence of adverse drug events in the pediatric  
44 population range from 4.3% to 16.7%; 12.2% of these events being serious in nature, with  
45 high morbidity and mortality.<sup>5</sup> Hospitalized children may be at a higher risk of an adverse  
46 event, as doses, drug safety, and effectiveness are often difficult to determine.<sup>6</sup> Kaushal  
47 and colleagues identified that the potential frequency of ADEs in children is three times  
48 higher than a previous study focused on ADEs in adults, however, the rate of avoidable  
49 ADEs was similar.<sup>4</sup> In intensive care units, multiple, potentially hazardous drugs are  
50  
51  
52  
53  
54  
55  
56  
57  
58  
59  
60

1  
2  
3 routinely administered, such as inotropes, sedation medications, analgesia, and antibiotics;  
4  
5 as the risk of an ADE increases by 1.7% for each additional drug used,<sup>5</sup> it is far more likely  
6  
7 that adverse reactions will occur in the ICU.  
8  
9

10 There are few studies documenting safety in drug administration in children in the  
11 ICU. The primary objective of this study was to describe ADEs in children admitted to the  
12 pediatric ICU (PICU) of a tertiary care hospital in Sao Paulo, Brazil. As secondary  
13 objectives, we attempted to identify risk factors for such events and tools that could detect  
14 them early as well as determine if there was impact on LOS.  
15  
16  
17  
18  
19  
20  
21  
22  
23

## 24 MATERIALS AND METHODS

25 We conducted a preliminary survey over a period of 22 days in March 2004 to  
26 identify the number of admissions required to effectively report ADEs in the PICU, a unit  
27 of 13 beds, with average occupation of 80%. Based on the results of this survey, we  
28 determined that it would then be necessary to study 150 admissions to reach a stable  
29 estimate of the incidence of ADEs and explore possible risk factors using a multivariate  
30 analysis (approximately 10 ADEs for each variable potentially associated). The study  
31 population consisted of consecutive admissions to the PICU between October 1, 2005 and  
32 March 31, 2006. The strategy to identify ADEs was through an active search, using pre-  
33 established parameters ("triggers"). A "trigger" can be defined as an occurrence, prompt, or  
34 flag, found when reviewing a patient's medical chart, that requires further investigation to  
35 determine the presence or absence of an adverse event.<sup>7,8</sup> Using this method, specific  
36 events, such as prescription or abrupt discontinuation of certain medications, prescription of  
37 antidotes, and some laboratory tests, serve as indicators for further investigation. Several  
38 triggers have been described in the literature,<sup>8</sup> and therefore we chose and adapted the ones  
39  
40  
41  
42  
43  
44  
45  
46  
47  
48  
49  
50  
51  
52  
53  
54  
55  
56  
57  
58  
59  
60

1  
2  
3 that seemed more consistent with the drugs commonly used in our PICU. Table 1 shows  
4 these triggers and the rationale for their use. The positive predictive value (PPV) of each  
5 trigger was calculated as the number of times that each trigger identified an ADE, divided  
6 by the total number of times the triggers were identified in the active search.  
7  
8  
9

10 The following methodology was undertaken for active search:

11  
12  
13 1. The admission form for each new patient in the PICU was entered by two trained  
14 intensive care pediatricians; data were analyzed and consolidated by 2 authors (Drs. Silva  
15 and Shibata).  
16  
17  
18  
19

20  
21  
22 2. The following records for each patient were reviewed, guided by triggers indicative of  
23 adverse events:  
24

25 - Laboratory tests (electronic database);  
26

27 - Clinical annotations;  
28

29 - Nursing annotations;  
30

31 - Prescription;  
32  
33

34  
35 3. The Naranjo algorithm was applied to classify the cause of the ADE: proven, probable,  
36 possible, or doubtful;<sup>9</sup>  
37  
38

39 4. Analysis of all proven, probable and possible ADEs.  
40  
41  
42

43 The study included only unavoidable ADEs, that is, only those that occurred during  
44 normal use of a drug, and not the result of a human error,<sup>10</sup> as well as those classified as  
45 moderate to severe according to the World Health Organization (WHO) guidelines: By this  
46 definition (WHO), ADE is any detrimental or undesirable event, unintended, which appears  
47 after administration of a drug at doses normally used for prophylaxis, diagnosis or  
48 treatment of a disease. A moderate reaction is one that requires modification of therapy and  
49 may require specific treatment; a severe reaction is potentially fatal and requires specific  
50  
51  
52  
53  
54  
55  
56  
57  
58  
59  
60

1  
2  
3 treatment, requires or prolongs hospitalization.<sup>11</sup> We analyzed only those ADEs that  
4  
5 appeared after admission. ADEs that appeared after admission but were related to drugs  
6  
7 that the patient was receiving before being admitted were defined as due to “prevalent  
8  
9 drug”. This definition eliminated, for example, ADEs due to chemotherapy already present  
10  
11 before admission in patients with cancer. ADEs related to drugs introduced after admission  
12  
13 were classified as due to "incident drug". The study protocol was reviewed and approved  
14  
15 by the Ethics Committee of the institution prior to the start of data collection (protocol  
16  
17 number 485/56/2005). Because of the observational nature of the study, without any  
18  
19 interference in therapy, informed consent was waived.  
20  
21  
22  
23

24  
25 Statistical analysis was performed using SPSS and Microsoft Excel, obtaining the  
26  
27 odds ratios (OR) by logistic regression. A multinomial logistic regression model was  
28  
29 performed with the variables "Presence of chronic disease", "Age", "Gender", "Number of  
30  
31 drugs" (independent) and "ADEs" (dependent). We chose the variables “Age” and “number  
32  
33 of drugs” because they have been significantly correlated with the incidence of ADEs.<sup>5</sup>  
34  
35 Some studies have shown a lower risk for ADEs in male children.<sup>12</sup> Chronic illness is an  
36  
37 important variable due to the continuous use of various drugs and the presence of organ  
38  
39 dysfunction. We used also a linear regression model for the variables "ADEs", "Presence of  
40  
41 chronic disease", "Age", "Gender", "Number of drugs" (independent), and "LOS"  
42  
43 (dependent). Significance of differences between means was obtained with the T test.  
44  
45 Variables involving time were analyzed using the Kaplan-Meier method, and  $p < 0.05$  was  
46  
47 considered statistically significant.  
48  
49  
50  
51  
52  
53  
54

## 55 RESULTS

56  
57  
58  
59  
60

1  
2  
3 In our pilot survey, we identified 20 adverse events of moderate to severe intensity  
4 over a period of 22 days in March 2004, which we calculated to represent at least 5 events  
5 per 100 patient-days.  
6  
7

8  
9  
10 In our actual study, there were 244 admissions to the PICU during the period  
11 between October 1, 2005 and March 31, 2006. Four patients were excluded because they  
12 were adult living-donors for liver transplant, and one patient was excluded due to age > 18  
13 years. We analyzed the remaining 239 patients, representing a total of 1818 days of PICU  
14 hospitalization. The average length of stay was 7.6 days with a standard deviation (SD) of  
15 9.5 days.  
16  
17

18  
19 The mean age was 67.5 months (median 51 months, range 1-243), and 113 patients  
20 (47.2%) were younger than 48 months. Ninety-four of the 239 patients were male (39.3%).  
21 Only 39 of the 239 patients did not have a chronic disease at admission (16.3%); the most  
22 prevalent chronic diseases were cancer (n = 48, 20%), hepatic disease (n = 37, 15.4%),  
23 neurological disease (n = 28, 11.7%), respiratory disease (n = 28, 11.7 %), and cardiac  
24 disease (n = 12, 5%). Admissions were mostly due to respiratory failure (n = 83),  
25 postoperative of neurosurgical, general, or cardiac surgery (n = 52), decreased level of  
26 consciousness (n = 14), or sepsis/septic shock (n = 28). Other causes were seizures,  
27 digestive bleeding, dehydration, renal failure, hypertension, and others.  
28  
29

30  
31 We observed 138 occurrences of triggers, as shown in Table 2, with their predictive  
32 positive values. These triggers led to the identification of 110 proven, probable, or possible  
33 ADEs in 84 patients (35.1%) during the six month study period, resulting in a rate of 60.5  
34 ADEs / 1,000 patient-days; 21 patients had more than one ADE. Thirty-nine ADEs were  
35 due to prevalent drugs and the remaining 71 (64.5%) were related to drugs introduced after  
36  
37  
38  
39  
40  
41  
42  
43  
44  
45  
46  
47  
48  
49  
50  
51  
52  
53  
54  
55  
56  
57  
58  
59  
60

1  
2  
3 PICU admission or “incidents” (Table 3). Table 4 shows the observed ADEs and related  
4  
5 drugs.  
6

7  
8 Gender, the presence of chronic disease, age, and administration of at least five  
9  
10 drugs were included in a multinomial logistic regression analysis as independent variables  
11  
12 for the incidence of ADEs (dependent variable); for males, the odds ratio (OR) was 1.31 (p  
13  
14 = 0.33); for the presence of a chronic disease, the OR was 0.71 (p = 0.35), and none of the  
15  
16 individual chronic conditions displayed an increased risk for ADEs; however, patient age  
17  
18 less than 48 months proved to be a significant risk factor, with an OR of 2.1 (95% CI: 1.19  
19  
20 - 3.72, p = 0.01). There was a positive interaction in patients aged less than 48 months and  
21  
22 concomitant administration of at least five drugs (OR = 2.05, 95% CI: 1.18-3.57, p = 0.01)  
23  
24 in the occurrence of at least one ADE. This interaction remained significant, with discrete  
25  
26 elevation of the OR until 9 concomitant drugs were administered (OR = 2.03, 95% CI:  
27  
28 1.15-3.60, p = 0.014, for age < 48 months; and OR = 4.69, 95% CI: 2.41-9.15, p < 0.0001  
29  
30 for the use of 9 drugs).  
31  
32  
33  
34  
35

36  
37 In a bivariate analysis, the number of drugs received by each patient correlated with  
38  
39 the number of ADEs ( $R^2 = 0.13$ , p < 0.0001). The likelihood of at least one ADE became  
40  
41 significant when the patient was given at least 5 drugs at the same time (OR 2.19 – 95% CI:  
42  
43 1.14 – 4.20, p = 0.018). We observed a linear elevation of the chance of an occurrence of an  
44  
45 ADE as the patient was administered more medications, achieving an OR of 7.26 (95% CI:  
46  
47 2.77 - 19.1, p < 0.0001) with 11 concomitant drugs. The same was observed for the  
48  
49 occurrence of more than one ADE (Table 5).  
50  
51

52  
53 There was a significant difference between the mean LOS between patients with  
54  
55 and without ADEs (11.1 vs. 5.3 days, p < 0.0001). In a bivariate linear regression model  
56  
57 (LOS as the dependent variable and ADEs as independent), the slope coefficient was 2.75  
58  
59  
60



1  
2  
3 (p = 0.001), meaning that each ADE corresponded to an increase of 2.75 days in the LOS.  
4  
5  
6 However, this increase was not maintained when other confounding variables were added  
7  
8 in the multivariate regression model. The only independent variables remaining in the final  
9  
10 model that affected LOS were the number of ADEs (p = 0.089; slope coefficient 1.49) and  
11  
12 the number of drugs (p < 0.001; slope coefficient 0.83; R<sup>2</sup> = 0.104); The slope coefficient  
13  
14 could indicate an increase in LOS of 1.49 days for each ADE, if statistically significant, but  
15  
16 the study did not have the power to demonstrate it. A sample calculation showed that in  
17  
18 order for this fact to be significant in a larger sample, it would take 1000 patients to achieve  
19  
20 p < 0.05 with a power of 0.94, considering the observed standard deviation of 9.5 for the  
21  
22 dependent variable “LOS” and 0.72 for independent “number of ADEs”. Other variables  
23  
24 did not show any significant relationship.  
25  
26  
27  
28

29 In addition, mean “survival” without ADEs (time from admittance to the PICU until  
30  
31 the occurrence of an ADE) was 19 days for patients older than 48 months and 11.2 days for  
32  
33 patients younger than 48 months (p = 0.017).  
34  
35

36 The drug classes involved in ADEs were: antibiotics (n = 41), diuretics (24),  
37  
38 antiseizures (23), sedatives and analgesics (17), steroids (18), antihypertensives (9),  
39  
40 bronchodilators (8), gastric protectors (3), immunosuppressives (4), vasoactive drugs (5),  
41  
42 hormonal analogues (4), antipyretics (4), and others (5).  
43  
44  
45  
46  
47

## 48 DISCUSSION

49  
50 Determining the occurrence of adverse events in an intensive care environment is a  
51  
52 complex task. The symptoms of the event may overlap the underlying disease and may be  
53  
54 caused by several unrelated factors including the pharmacokinetic profile of the drug,  
55  
56 unknown drug allergies of each patient, or human error. These difficulties may serve as an  
57  
58  
59  
60

1  
2  
3 explanation for why many events are not recognized as ADEs. Frequently, other drugs are  
4 administered in an attempt to solve the problem created by the ADE, without the specific  
5 diagnosis. While some events are easily attributed to certain drugs, there are several  
6 possible and poorly documented events and some are completely unknown and rare. There  
7 are also a multitude of patient-specific risk-factors leading to the occurrence of an ADE,  
8 including age and certain comorbidities, such as the presence of renal or hepatic  
9 impairment. Drug-related factors such as toxicity, time of administration, dosage, and  
10 duration of use are variables that can also impact the probability of ADEs. In addition, new  
11 drugs that have just completed phase III clinical trials may not have been powered to detect  
12 rare events.<sup>13</sup> In general, if we don't look for ADEs, it is unlikely that we will find them.<sup>14</sup>  
13  
14  
15  
16  
17  
18  
19  
20  
21  
22  
23  
24  
25  
26

27 In the absence of reliable empirical methods for detection of ADEs, formal and  
28 logical tools can help differentiate an ADE from a symptom caused by exacerbations in a  
29 patient's underlying condition. The most widely accepted formal instrument to obtain this  
30 is the Naranjo algorithm; however, this tool is also not without bias: in our sample, only 5  
31 of 110 ADEs were classified as "proven" or definite (scores 9 and 10). Therefore, some  
32 included events may not have been ADEs. However, to prove an ADE according to the  
33 algorithm, it is necessary to re-administer the drug and observe the event again, or obtain  
34 serum levels that are known to be toxic. The first option is strongly discouraged and the  
35 second may be technically impossible or unavailable. However, we excluded the "doubtful"  
36 events (score equal to or less than 1) from our analysis and some of these events may have  
37 actually been ADEs.  
38  
39  
40  
41  
42  
43  
44  
45  
46  
47  
48  
49  
50  
51  
52

53 Most of our patients had chronic diseases, which may contribute to a higher  
54 incidence of ADEs, due to the use of multiple medications. This population of chronic  
55 patients reflects the current reality of Brazilian university hospitals. We observed no  
56  
57  
58  
59  
60

1  
2  
3 significant difference in ADE incidence between patients with and without chronic  
4 diseases, which can be explained by the exclusion of events prior to PICU admission and  
5  
6 was more likely related to the medications used regularly.  
7  
8  
9

10 The incidence of observed events (35.1% of admissions) is much higher than those  
11 reported in adult patients hospitalized in ICUs (around 9%).<sup>15</sup> Furthermore, we found that  
12 younger children under the age of 48 months, which constitute approximately half the  
13 patient sample, were more likely to have ADEs. This was particularly significant with the  
14 administration of over five drugs at the same time, and also resulted in an ADE earlier in  
15 the patient's ICU stay. The high incidence of ADEs also highlights the importance of an  
16 active search focused on triggers to detect ADEs in children: Holdsworth et al reported  
17 ADE rates of 6 per 100 admissions (ICU and pediatric ward, determined using a chart  
18 review by a pharmacist).<sup>16</sup> Takata et al. performed a search focused on triggers and reported  
19 11.1 events/100 inpatients, almost double that of the retrospective study. These authors  
20 indicated that performing a search focused on specific circumstances associated with ADEs  
21 in specific elements of the patient's chart can increase the rates of observed ADEs.<sup>17</sup> The  
22 methodology we used in this study (definition of triggers and daily search in the records of  
23 patients) is a simple way to perform an active search for ADEs. Triggers can be  
24 individualized for each hospital setting according to the most frequently used medications.  
25 PPVs can be determined through a simple calculation that assists in the choice of triggers  
26 that are most useful in each unit. We observed higher PPVs for biochemical alterations; in  
27 an automated process, the system of the laboratory itself could alert for possible ADEs.  
28  
29  
30  
31  
32  
33  
34  
35  
36  
37  
38  
39  
40  
41  
42  
43  
44  
45  
46  
47  
48  
49  
50  
51  
52  
53  
54

55 We wish to highlight that our study evaluated severely ill children under intensive  
56 care receiving multiple drugs (up to 18), and the chances of developing an ADE is  
57  
58  
59  
60

1  
2  
3 therefore, more likely. In addition, comparing event rates is also challenging and potentially  
4 misleading as definitions of ADEs are unclear among studies, ranging from a benign and  
5  
6 transient alteration of electrolytes to vital organ damage.<sup>10</sup>  
7  
8

9  
10 We investigated whether ADEs may have an impact on the LOS in the PICU. The  
11 most important limitation of the study was that our sample did not have the power to  
12 implicate ADEs as a causative factor in prolonging PICU stays by 1.5 days; however,  
13 calculations based on standard deviations observed in our sample showed a high probability  
14 that this would be true in a longer-term study. In addition to possible patient harm, there are  
15 significant costs associated with patient stays in the ICU: An increase of 1.5 days per event  
16 results in an additional 330 days per year. Estimating cost at \$600.00 (American dollars)  
17 each day, ADEs amount to \$198,000 per year, which is a considerable sum for our public  
18 health system. In principle, the events occurred as a result of habitual use of drugs and were  
19 therefore "inevitable"; however, a systematic approach could convert some ADEs from  
20 presumably inevitable to avoidable. A good example cited by Kane-Gill et al<sup>10</sup> describes  
21 bleeding caused by the correct dose of heparin in a patient being monitored by partial  
22 thromboplastin time and would be classified as inevitable. If an investigation identified that  
23 the laboratory has changed their method for thromboplastin time and failed to communicate  
24 the necessary adjustment, the error would become preventable. More studies on  
25 pharmacokinetics and drug interactions in children are required to define optimal dosing  
26 regimens and reduce ADEs.  
27  
28  
29  
30  
31  
32  
33  
34  
35  
36  
37  
38  
39  
40  
41  
42  
43  
44  
45  
46  
47  
48  
49

50 Another limitation of the study was the short time of observation, which did not  
51 include the seasonality of respiratory diseases. A positive aspect of the study was the  
52 analysis of a PICU population in a country outside Europe and North America, therefore  
53 making it possible to analyze ADEs due to drugs such as dipyrene. **In Brazil, the reporting**  
54  
55  
56  
57  
58  
59  
60

1  
2  
3 of ADEs is incipient. The online system provided by the health authority only receives  
4  
5 notifications, which are not mandatory. Active search is not utilized, even in private  
6  
7 institutions. We hope that our study will contribute to a future systematic approach to this  
8  
9 subject in developing countries.  
10  
11  
12  
13

## 14 15 CONCLUSIONS

16  
17 The use of multiple drugs as well as lower patient age favors the occurrence of ADEs,  
18  
19 which in turn may result in an increase in the length of PICU hospitalization. The use of an  
20  
21 active search using triggers can provide a systematic approach to identify ADEs in PICUs.  
22  
23  
24  
25  
26  
27  
28

## 29 REFERENCES

- 30  
31  
32 1. Niederhauser VP. Prescribing for children: issues in pediatric pharmacology. *Nurse*  
33  
34 *Pract* 1997;22(3):16-18.  
35  
36 2. Hussain E, Kao E. Medication safety and transfusion errors in the ICU and beyond.  
37  
38 *Crit Care Clin* 2005;21:91-110.  
39  
40 3. Wilson RM, Runciman WB, Gibberd RW, Harrison BT, Newby L, Hamilton JD.  
41  
42 The Quality in Australian Health Care Study. *Med J Aust* 1995;163:458-471.  
43  
44 4. Kaushal R, Bates DW, Landrigan C, et al. Medication errors and adverse drug  
45  
46 events in pediatric inpatients. *JAMA* 2001;285:2114-2120.  
47  
48 5. Impicciatore P, Choonara I, Clarkson A, Provasi D, Pandolfini C, Bonati M.  
49  
50 Incidence of adverse drug reactions in paediatric in/out-patients: a systematic review and  
51  
52 meta-analysis of prospective studies. *Br J Clin Pharmacol* 2001;52:77-83.  
53  
54  
55  
56  
57  
58  
59  
60

- 1  
2  
3 6. Gill AM, Leach HJ, Hughes J, Barker C, Nunn AJ, Choonara I. Adverse drug  
4 reactions in a paediatric intensive care unit. *Acta Paediatr* 1995;84:438-441.  
5
- 6  
7 7. Rozich JD, Haraden CR, Resar RK. Adverse drug event trigger tool: a practical  
8 methodology for measuring medication related harm. *Qual Saf Health Care*  
9 2003;12(3):194–200.  
10
- 11  
12 8. Resar RK, Rozich JD, Classen DC. Methodology and rationale for the measurement  
13 of harm with trigger tools. *Qual Saf Health Care* 2003;12(suppl 2):ii39 –ii45.  
14
- 15  
16 9. Naranjo CA, Busto U, Sellers EM, et al. A method for estimating the probability of  
17 adverse drug reactions. *Clin Pharmacol Ther* 30 (2): 239–245.  
18
- 19  
20 10. Kane-Gill SL, Kirisci L, Verrico MM, Rothschild JM. Analysis of risk factors for  
21 adverse drug events in critically ill patients. *Crit Care Med* 2012;40(3):823-8.  
22
- 23  
24 11. World Health Organization (WHO). Council for International Organizations of  
25 Medical Sciences. Guidelines for preparing core clinical safety information on drug from  
26 CIOMS Working Group III. Geneva; 1995.  
27
- 28  
29 12. Smyth RM, Gargon E, Kirkham J, Cresswell L, Golder S, Smyth R, Williamson P.  
30 Adverse drug reactions in children-a systematic review. *PLoS One*. 2012;7(3):e24061.  
31
- 32  
33 13. Brown SD Jr, Landry FJ. Recognizing, reporting, and reducing adverse drug  
34 reactions. *South Med J* 2001;94(4):370-3.  
35
- 36  
37 14. Kelly WN. How Can I Recognize an Adverse Drug Event. Available online at:  
38 <http://www.medscape.org/viewarticle/569794>. Accessed Feb 1, 2012.  
39
- 40  
41 15. Vargas E, Terleira A, Hernando F, Perez E, Cordon C, Moreno A, Portoles A.  
42 Effect of adverse drug reactions on length of stay in surgical intensive care units. *Crit Care*  
43 *Med* 2003;31(3):694-8.  
44  
45  
46  
47  
48  
49  
50  
51  
52  
53  
54  
55  
56  
57  
58  
59  
60

16. Holdsworth MT, Fichtl RE, Behta M, et al. Incidence and impact of adverse drug events in pediatric inpatients. *Arch Pediatr Adolesc Med* 2003;157(1):60–65.

17. Takata GS, Mason W, Taketomo C, Logsdon T, Sharek PJ. Development, testing, and findings of a pediatric-focused trigger tool to identify medication-related harm in US children's hospitals. *Pediatrics* 2008;121(4):e927-3.

Table 1 – rationale for the use of triggers

| Triggers                               | Rationale for use                                                                                                                             |
|----------------------------------------|-----------------------------------------------------------------------------------------------------------------------------------------------|
| Hematological alterations              | Anemia, leukopenia, and thrombocytopenia are adverse reactions of various drugs                                                               |
| Biochemical alterations                | Hyponatremia, hypokalemia, elevated BUN and creatinine are common events with various drugs                                                   |
| Cardiac alterations                    | Tachycardia is common, for example, with beta-adrenergic agents, which can cause other arrhythmias; bradycardia may occur with beta-blockers  |
| Antihistamines                         | Indicator of allergic reaction                                                                                                                |
| Corticoids                             | Potential indicator of allergic reaction                                                                                                      |
| Allergic reactions                     | Frequently reported adverse events                                                                                                            |
| Non-programmed endotracheal intubation | Potential indicator of respiratory depression, common, for example, with benzodiazepines                                                      |
| Level of consciousness degradations    | Common with benzodiazepines, anticonvulsants                                                                                                  |
| Drug interactions                      | For example, hypotension and lethargy caused by concomitant administration of sedatives and anticonvulsants                                   |
| Antiseizures prescription              | Potential indicative of unexpected seizure, when using medications that may lead to changes in electrolytes and seizures, like amphotericin B |
| Drug intolerance                       | For example, vomiting and diarrhea, frequent events with various medications, such as antibiotics                                             |
| Non-programmed suspension of drug      | Indicative of intolerance or adverse reaction                                                                                                 |

|    |                                         |                                         |
|----|-----------------------------------------|-----------------------------------------|
| 1  |                                         |                                         |
| 2  |                                         |                                         |
| 3  | Fever                                   | Adverse event of drugs such as          |
| 4  |                                         | amphotericin B                          |
| 5  | Sudden death                            | Already reported with drug              |
| 6  |                                         | combinations containing dipyrone        |
| 7  | Serum level alteration                  | for monitored drugs such as             |
| 8  |                                         | vancomycin and phenobarbital, with a    |
| 9  |                                         | narrow therapeutic range and            |
| 10 |                                         | potentially toxic at high levels        |
| 11 | Aminophylline / adrenaline prescription | Potential indicators of severe allergic |
| 12 |                                         | reactions                               |
| 13 | Antidotes prescription                  | For example, the use of flumazenil      |
| 14 |                                         | may indicate adverse events due to the  |
| 15 |                                         | use of benzodiazepines                  |
| 16 | Others                                  | Adverse events discovered in the        |
| 17 |                                         | review of medical records, and that     |
| 18 |                                         | does not fit in any trigger, being the  |
| 19 |                                         | trigger the event itself                |
| 20 |                                         |                                         |
| 21 |                                         |                                         |
| 22 |                                         |                                         |
| 23 |                                         |                                         |
| 24 |                                         |                                         |
| 25 |                                         |                                         |
| 26 |                                         |                                         |
| 27 |                                         |                                         |
| 28 |                                         |                                         |
| 29 |                                         |                                         |
| 30 |                                         |                                         |
| 31 |                                         |                                         |
| 32 |                                         |                                         |
| 33 |                                         |                                         |
| 34 |                                         |                                         |
| 35 |                                         |                                         |
| 36 |                                         |                                         |
| 37 |                                         |                                         |
| 38 |                                         |                                         |
| 39 |                                         |                                         |
| 40 |                                         |                                         |
| 41 |                                         |                                         |
| 42 |                                         |                                         |
| 43 |                                         |                                         |
| 44 |                                         |                                         |
| 45 |                                         |                                         |
| 46 |                                         |                                         |
| 47 |                                         |                                         |
| 48 |                                         |                                         |
| 49 |                                         |                                         |
| 50 |                                         |                                         |
| 51 |                                         |                                         |
| 52 |                                         |                                         |
| 53 |                                         |                                         |
| 54 |                                         |                                         |
| 55 |                                         |                                         |
| 56 |                                         |                                         |
| 57 |                                         |                                         |
| 58 |                                         |                                         |
| 59 |                                         |                                         |
| 60 |                                         |                                         |

Table 2 – Occurrences of triggers used for active search.

| Triggers                                | Number of occurrences | Positive predictive value |
|-----------------------------------------|-----------------------|---------------------------|
| Hematological alterations               | 8                     | 5.79%                     |
| Biochemical alterations                 | 64                    | 46.37%                    |
| Cardiac alterations                     | 17                    | 12.3%                     |
| Antihistamines                          | 5                     | 3.62%                     |
| Corticoids                              | 2                     | 1.45%                     |
| Allergic reactions                      | 11                    | 7.97%                     |
| Non-programmed endotracheal intubation  | 1                     | 0.72%                     |
| Level of consciousness degradations     | 2                     | 1.45%                     |
| Drug interactions                       | 8                     | 5.80%                     |
| Antiseizures prescription               | 2                     | 1.45%                     |
| Drug intolerance                        | 0                     | 0%                        |
| Non-programmed suspension of drug       | 1                     | 0.72%                     |
| Fever                                   | 0                     | 0%                        |
| Sudden death                            | 0                     | 0%                        |
| Serum level alteration                  | 0                     | 0%                        |
| Aminophylline / adrenaline prescription | 0                     | 0%                        |
| Antidotes prescription                  | 3                     | 2.17%                     |
| Others                                  | 14                    | 10.14%                    |



Table 3 – Distribution of prevalent-drug and incident-drug adverse events according to causality.

| ADE      | Prevalent-drug | Incident-drug | TOTAL |
|----------|----------------|---------------|-------|
| Proven   | 0              | 5             | 5     |
| Probable | 12             | 32            | 44    |
| Possible | 27             | 34            | 61    |
| TOTAL    | 39             | 71            | 110   |

Table 4 – Observed adverse drug events (ADEs) and related drugs

| Adverse Drug Events (ADEs)             | N  | Related drugs                                                                                                                                      |
|----------------------------------------|----|----------------------------------------------------------------------------------------------------------------------------------------------------|
| Hyponatremia                           | 27 | furosemide, fentanyl, carbamazepine, vigabatrin<br>topiramate, hydrochlorothiazide, somatostatin,<br>vancomycin, rifampicin, ranitidine, phenytoin |
| Hyperglycemia                          | 17 | dexamethasone, hydrocortisone,<br>methylprednisolone, terbutaline, tacrolimus                                                                      |
| Hypokalemia                            | 13 | amphotericin b, terbutaline, furosemide,<br>ranitidine                                                                                             |
| Skin rash and urticaria                | 11 | vancomycin, dipyrone, cefepime, ceftriaxone,<br>levetiracetam, dipyrone, rasburicase                                                               |
| Hypoventilation/desaturation of oxygen | 6  | midazolam, propofol, fentanyl, morphine,<br>diazepam                                                                                               |
| Bradycardia                            | 4  | midazolam                                                                                                                                          |
| Hypotension                            | 4  | midazolam, furosemide, thiopental,<br>chlorpromazine                                                                                               |
| Liver enzyme abnormalities             | 4  | meropenem, carbamazepine, amlodipine,<br>carvedilol, clonidine, amitriptyline,<br>phenobarbital                                                    |
| Hypertension                           | 3  | prednisone tacrolimus, dopamine                                                                                                                    |
| Increased BUN and creatinine           | 3  | vancomycin, tacrolimus                                                                                                                             |
| Seizure                                | 2  | hydrocortisone, liposomal amphotericin B,<br>cefepime                                                                                              |
| Tachycardia                            | 2  | terbutaline                                                                                                                                        |
| Anemia                                 | 2  | ketoprofen, paracetamol                                                                                                                            |
| Extrasystole                           | 2  | carvedilol, terbutaline                                                                                                                            |
| Increased number of platelets          | 2  | Meropenem, ceftriaxone                                                                                                                             |
| Vomiting                               | 2  | Nitroprusside, tacrolimus                                                                                                                          |
| Cardiorespiratory arrest               | 1  | dipyrone                                                                                                                                           |
| Thrombocytopenia                       | 1  | dipyrone                                                                                                                                           |
| Apnea                                  | 1  | phenytoin                                                                                                                                          |
| Leukopenia                             | 1  | imipenem                                                                                                                                           |

|                          |   |                                 |
|--------------------------|---|---------------------------------|
| Stevens-Johnson syndrome | 1 | trimethoprim / sulfamethoxazole |
| Eosinophilia             | 1 | ceftriaxone                     |

Table 5 – Odds ratios related to the concomitant use of medications.

| Number of drugs | Occurrence of at least one ADE |            |          | Occurrence of more than one ADE |            |          |
|-----------------|--------------------------------|------------|----------|---------------------------------|------------|----------|
|                 | <i>Odds ratio</i>              | 95% CI     | <i>P</i> | <i>Odds ratio</i>               | 95% CI     | <i>P</i> |
| 5               | 2.19                           | 1.14-4.2   | 0.018    | 2.38                            | 0.67-8.38  | 0.175    |
| 6               | 3.03                           | 1.69-5.40  | 0.0002   | 3.28                            | 1.06-10.07 | 0.037    |
| 7               | 3.69                           | 2.11-6.46  | < 0.0001 | 2.95                            | 1.14-7.60  | 0.025    |
| 8               | 3.84                           | 2.24-6.80  | < 0.0001 | 3.35                            | 1.34-8.35  | 0.009    |
| 9               | 4.40                           | 2.29-8.45  | < 0.0001 | 3.14                            | 1.24-7.90  | 0.015    |
| 10              | 6.48                           | 2.85-14.77 | < 0.0001 | 3.69                            | 1.36-9.99  | 0.010    |
| 11              | 7.26                           | 2.77-19.01 | < 0.0001 | 5.55                            | 1.98-15.52 | 0.001    |
